# Supplementary material for: Statistical Methods in the Study of Protein Binding and Its Relationship to Drug Bioavailability in Breast Milk
Source: MDPI journal article supplement (doi:10.3390/molecules27113441), 2022-05-26
Supplement: s1 [file s1]

**Table S1.** Biological properties of APIs (n = 129).

| API                  | B1    | B2    | B3     | BB <sub>vivo</sub> | CNS+/- | LactMed | LLL H | log U/D<br>7.2 | M/P   | M/P <sub>code</sub> | PB    | PB <sub>code</sub> | PhCharge |
|----------------------|-------|-------|--------|--------------------|--------|---------|-------|----------------|-------|---------------------|-------|--------------------|----------|
| acebutolol           | 0.09  | -0.86 | -0.83  |                    | 0      | 2       | 3     | -2.2           | 9.65  | 4                   | 0.26  | 5                  | 1        |
| aceclofenac          | -0.44 | -0.66 | 1.11   |                    |        |         |       | -4.6           |       |                     | 0.99  | 1                  | -1       |
| acenocumarol         | -1.07 | -1.20 | 0.68   |                    | 1      | 1       |       | -2.7           |       |                     | 0.987 | 1                  | -1       |
| acetylsalicylic acid | -4.75 | -0.47 | -13.67 |                    | 1      | 2       | 3     | -3.72          | 1.08  | 3                   | 0.995 | 1                  | -1       |
| aciclovir            | -1.71 | -1.21 | -1.39  | -0.836             |        | 1       | 2     | -2.09          | 2.35  | 4                   | 0.21  | 5                  | 0        |
| alprazolam           | 0.29  | -0.06 | 1.68   | 0.019              | 1      | 1       | 3     | -4.83          | 0.18  | 1                   | 0.8   | 4                  | 0        |
| amiodarone           | 0.60  | -0.14 | 0.84   |                    | 1      | 2       |       | -2.17          | 8.8   | 4                   | 0.96  | 2                  | 1        |
| amlodipine           | -0.09 | -1.05 | -1.42  |                    | 0      | 1       | 3     | -1.77          |       |                     | 0.975 | 2                  | 1        |
| amoxicillin          | -2.23 | -1.99 | -0.74  |                    | 0      | 1       | 1     | -4.76          | 0.028 | 1                   | 0.2   | 5                  | 0        |
| astemizol            | -0.31 | -0.05 | -0.31  |                    | 1      |         |       | -1.48          | 4.4   | 4                   | 0.967 | 2                  | 1        |
| atorvastatin         | 0.37  | -1.24 | 0.11   |                    | 0      |         | 3     | -2.91          |       |                     | 0.98  | 1                  | -1       |
| atropine             | -0.34 | -0.25 | 0.19   | -0.060             | 1      |         | 3     | -2.78          |       |                     | 0.18  | 5                  | 1        |
| azithromycin         | 0.51  | -2.33 | 0.56   |                    | 0      | 1       | 2     | -1.39          |       |                     | 0.29  | 5                  | 2        |
| betaxolol            | 0.29  | -0.26 | -0.17  |                    | 0      | 2       | 3     | -2.23          | 2.75  | 4                   | 0.5   | 5                  | 1        |
| bilastine            | -0.70 | -0.71 | 0.39   |                    |        |         |       | -0.61          |       |                     | 0.87  | 3                  | 0        |
| biperiden            | 0.55  | 0.17  | 0.69   |                    | 1      |         |       | -2.06          |       |                     | 0.6   | 4                  | 1        |
| bisoprolol           | -0.42 | -0.41 | 0.40   |                    | 0      |         | 3     | -2.22          |       |                     | 0.3   | 5                  | 1        |
| bromazepam           | -0.27 | -0.32 | 0.63   |                    | 1      |         |       | -4.19          |       |                     | 0.7   | 4                  | 0        |
| bromocriptine        | -0.93 | -1.34 | 1.58   | -1.100             | 0      | 0       |       | -0.76          |       |                     | 0.93  | 3                  | 0        |
| buspirone            | -0.71 | -0.57 | -0.08  | 0.480              | 1      | 1       | 3     | -0.52          |       |                     | 0.95  | 2                  | 1        |
| caffeine             | -0.81 | -0.31 | -1.20  | -0.022             | 1      | 2       | 2     | -6.68          | 0.661 | 2                   | 0.3   | 5                  | 0        |
| capecitabine         | -1.57 | -1.38 | -0.40  |                    | 1      |         |       | -1.79          |       |                     | 0.6   | 4                  | 0        |
| captopril            | 0.18  | -0.37 | -0.52  |                    | 1      | 1       | 2     | -3.61          | 0.031 | 1                   | 0.275 | 5                  | -1       |
| carbamazepine        | -4.80 | -0.19 | -14.67 | -0.070             | 1      | 2       | 2     | -6.74          | 0.558 | 2                   | 0.76  | 4                  | 0        |
| carbegoline          | -0.88 | -0.60 | -0.52  |                    | 1      |         | 4     | -2.21          |       |                     | 0.41  | 5                  | 2        |
| carvedilol           | -0.17 | -0.66 | -1.69  |                    | 0      |         | 3     | -1.04          |       |                     | 0.98  | 1                  | 1        |
| cefuroxime           | -3.12 | -2.64 | -1.71  |                    | 0      | 0       | 2     | -4.61          |       |                     | 0.5   | 5                  | -1       |
| celecoxib            | 0.29  | -0.70 | -0.16  |                    | 1      | 1       | 2     | -2.48          | 0.41  | 2                   | 0.97  | 2                  | 0        |

|                           |       |       |       |        |   |   |   |       |       |   |       |   |    |
|---------------------------|-------|-------|-------|--------|---|---|---|-------|-------|---|-------|---|----|
| <b>celiprolol</b>         | 0.07  | -0.91 | -0.89 |        |   |   |   | -2.3  |       |   | 0.275 | 5 | 1  |
| <b>cephalexin</b>         | -0.06 | 0.03  | -1.32 |        | 0 | 1 | 1 | -4.08 | 0.012 | 1 | 0.14  | 5 | 0  |
| <b>cetirizine</b>         | -0.32 | -0.30 | 0.39  | -2.150 | 1 | 1 | 2 | -3.74 |       |   | 0.93  | 3 | 0  |
| <b>chloramphenikol</b>    | -1.61 | -1.30 | -0.79 |        | 0 | 1 | 4 | -3.83 | 0.6   | 2 | 0.55  | 4 | 0  |
| <b>chlorpromazine</b>     | 0.24  | 0.04  | 1.22  | 0.950  | 1 | 1 | 3 | -2.21 | 0.4   | 2 | 0.9   | 3 | 1  |
| <b>chlortalidone</b>      | -1.70 | -1.34 | -0.98 |        | 1 | 1 | 4 | -2.37 | 0.062 | 1 | 0.75  | 4 | 0  |
| <b>cimetidine</b>         | -1.64 | -1.28 | -0.96 | -1.420 | 0 | 1 | 1 | -0.13 | 1.7   | 4 | 0.17  | 5 | 1  |
| <b>ciprofloxacin</b>      | -0.14 | -0.62 | -1.59 |        |   | 1 | 3 | -0.36 | 2.15  | 4 | 0.3   | 5 | 0  |
| <b>cisapride</b>          | -0.79 | -0.83 | 0.46  |        | 1 | 1 |   | -0.27 | 0.045 | 1 | 0.975 | 2 | 1  |
| <b>clarithromycin</b>     | -2.57 | -2.38 | -0.67 |        | 0 | 1 | 1 | -0.96 | 0.25  | 1 | 0.7   | 4 | 1  |
| <b>clindamycin</b>        | 0.38  | -1.15 | 0.13  |        | 0 | 1 | 2 | -1.53 | 0.3   | 1 | 0.93  | 3 | 1  |
| <b>clobazam</b>           | -0.67 | -0.10 | -1.37 | 0.350  | 1 | 1 | 3 | -1.39 | 0.25  | 1 | 0.85  | 3 | -1 |
| <b>clonidine</b>          | -0.36 | -0.04 | -0.53 | 0.150  | 1 | 2 | 3 | -0.9  | 2     | 4 | 0.3   | 5 | 1  |
| <b>clorazepate</b>        | -0.95 | -1.09 | 0.71  |        | 1 | 2 | 3 | -1.9  | 0.2   | 1 | 0.975 | 2 | -1 |
| <b>clozapine</b>          | 0.36  | 0.50  | 0.22  |        | 1 |   | 3 | -0.13 | 2.79  | 4 | 0.99  | 1 | 1  |
| <b>cypheptadine</b>       | -0.09 | 0.10  | -0.09 |        | 1 |   | 3 | -1.75 |       |   | 0.975 | 2 | 1  |
| <b>desloratidine</b>      | -0.22 | 0.15  | -0.63 |        | 1 | 1 | 2 | -3.07 |       |   | 0.845 | 4 | 1  |
| <b>diazepam</b>           | 0.11  | 0.02  | 0.84  | 0.346  | 1 | 2 | 3 | -3.8  | 0.19  | 1 | 0.98  | 1 | 0  |
| <b>digoxin</b>            | -2.46 | -2.70 | 0.67  | -1.230 | 0 | 1 | 2 | -6.3  | 0.7   | 2 | 0.25  | 5 | 0  |
| <b>dihydroergotamine</b>  | -0.18 | -1.34 | -1.72 |        | 0 |   | 4 | -0.02 |       |   | 0.93  | 3 | 1  |
| <b>diphenhydramin</b>     | 0.27  | 0.35  | 0.38  |        | 1 | 1 | 2 | -1.56 |       |   | 0.985 | 1 | 1  |
| <b>doxazosin</b>          | 0.46  | -1.42 | 0.41  |        | 1 | 1 | 4 | -0.68 |       |   | 0.98  | 1 | 1  |
| <b>doxycycline</b>        | -2.83 | -2.36 | -1.60 |        | 0 | 1 | 3 | -0.47 | 0.34  | 1 | 0.9   | 3 | 0  |
| <b>drotaverine</b>        | -0.81 | -0.24 | -1.42 |        | 1 |   |   | -1.03 |       |   | 0.875 | 3 | 1  |
| <b>enalapril</b>          | -0.93 | -0.99 | 0.49  |        | 0 | 1 | 2 | -4.05 | 0.02  | 1 | 0.55  | 4 | -1 |
| <b>epplerone</b>          | -0.73 | -0.72 | 0.32  |        | 1 |   | 3 |       |       |   | 0.5   | 5 | 0  |
| <b>escitalopram</b>       | 0.27  | -0.03 | -0.23 |        | 1 | 1 | 2 | -2.37 | 2.2   | 4 | 0.56  | 4 | 1  |
| <b>estradiol benzoate</b> | -0.97 | -1.07 | 1.44  |        |   |   | 3 |       |       |   | 0.95  | 2 | 0  |
| <b>estrone</b>            | -0.87 | -1.02 | 0.77  |        |   |   |   | -3.05 |       |   | 0.95  | 2 | 0  |
| <b>famotidine</b>         | -3.55 | -3.26 | -1.22 |        | 1 | 1 | 1 | -0.73 | 1.5   | 4 | 0.175 | 5 | 1  |
| <b>fexofenadine</b>       | -0.48 | -0.75 | 1.24  | -0.980 | 0 | 1 | 2 | -0.27 |       |   | 0.65  | 4 | 0  |

|                               |       |       |       |        |   |   |   |       |       |   |       |   |    |
|-------------------------------|-------|-------|-------|--------|---|---|---|-------|-------|---|-------|---|----|
| <b>fluoxetine</b>             | 0.43  | 0.21  | 0.30  |        | 1 | 2 | 2 | -2.85 | 0.68  | 2 | 0.945 | 2 | 1  |
| <b>flupenthixol</b>           | 0.18  | -0.29 | 2.00  |        | 1 | 1 |   | -0.15 | 1.15  | 3 | 0.95  | 2 | 1  |
| <b>furosemide</b>             | -1.84 | -1.55 | -0.79 |        | 0 |   | 3 | -4.16 |       |   | 0.95  | 2 | -1 |
| <b>gliclazide</b>             | -0.86 | -0.84 | 0.29  |        | 1 |   |   | -1.13 |       |   | 0.94  | 3 | -1 |
| <b>haloperidol</b>            | -0.26 | -0.10 | -0.01 | 1.340  | 1 | 1 | 3 | -0.84 | 0.64  | 2 | 0.92  | 3 | 1  |
| <b>hydrocortisone acetate</b> | -0.12 | -0.42 | 1.44  |        |   |   | 2 | -5.22 |       |   | 0.95  | 2 | 0  |
| <b>hydroxyzine</b>            | -0.21 | -0.03 | -0.05 | 0.285  | 1 | 1 | 1 | -0.58 |       |   | 0.93  | 3 | 1  |
| <b>ibuprofen</b>              | 0.17  | -0.05 | 1.25  | -0.180 | 1 | 1 | 1 | -2.79 | 0     | 1 | 0.95  | 2 | -1 |
| <b>indomethacin</b>           | -1.02 | -0.47 | -1.38 | -1.260 | 1 | 1 | 3 | -3.24 | 0.47  | 2 | 0.97  | 2 | -1 |
| <b>ketoprofen</b>             | 0.53  | -0.32 | 0.62  |        | 1 | 1 |   | -2.97 |       |   | 0.99  | 1 | -1 |
| <b>ketotifen</b>              | -0.54 | -0.23 | -0.54 |        | 1 | 0 | 3 | -1.64 |       |   | 0.75  | 4 | 1  |
| <b>lamotrigine</b>            | -0.99 | -0.90 | 0.03  | 0.480  | 1 | 2 | 3 | -1.81 | 0.513 | 2 | 0.55  | 4 | 0  |
| <b>levocetirizine</b>         | -0.12 | -0.30 | 1.08  |        | 1 | 1 | 3 | -3.74 |       |   | 0.915 | 3 | 0  |
| <b>levofloxacin</b>           | -0.85 | -0.63 | -0.36 |        |   | 1 | 3 | -2.01 | 0.95  | 3 | 0.31  | 5 | -1 |
| <b>loperamide</b>             | 0.25  | -0.15 | 1.84  | 0.770  | 0 |   | 2 | -0.56 |       |   | 0.97  | 2 | 1  |
| <b>loratadine</b>             | -0.44 | -0.13 | -0.52 |        | 1 | 1 | 1 | -2.93 | 1.2   | 4 | 0.98  | 1 | 0  |
| <b>lorazepam</b>              | -0.25 | -0.44 | 1.05  | 0.440  | 1 | 1 | 3 | -3.6  | 0.205 | 1 | 0.87  | 3 | 0  |
| <b>medazepam</b>              | 0.56  | 0.30  | 1.48  |        | 1 |   |   | -1.02 |       |   | 0.99  | 1 |    |
| <b>meloxicam</b>              | -2.05 | -1.63 | -1.25 |        | 0 |   | 3 | -2.7  |       |   | 0.99  | 1 | -1 |
| <b>methyldopa</b>             | -1.62 | -1.11 | -1.40 |        | 0 | 1 | 2 | -1.63 | 0.265 | 1 | 0.2   | 5 | 0  |
| <b>mianserin</b>              | 0.19  | 0.44  | -0.20 | 0.990  | 1 | 1 |   | -1.06 | 2.2   | 4 | 0.9   | 3 | 0  |
| <b>midazolam</b>              | 0.28  | 0.14  | 1.04  | 0.398  | 1 | 1 | 2 | -1.17 | 0.785 | 2 | 0.97  | 2 | 0  |
| <b>mirtazapine</b>            | 0.03  | 0.24  | -0.09 | 0.530  | 1 | 1 | 3 | -0.9  | 1.1   | 3 | 0.85  | 3 | 0  |
| <b>montelukast</b>            | 0.77  | -0.58 | 1.40  |        | 1 | 1 | 3 | -2.44 |       |   | 0.99  | 1 | -1 |
| <b>naproxen</b>               | -0.10 | -0.20 | 0.83  |        | 1 | 1 | 4 | -2.36 | 0.16  | 1 | 0.99  | 1 | -1 |
| <b>nebivolol</b>              | -0.02 | -0.59 | -1.18 |        | 1 |   | 3 | -1.45 |       |   | 0.98  | 1 | 1  |
| <b>olanzapine</b>             | -1.34 | -0.80 | -1.45 |        |   | 1 | 2 | -0.13 | 0.38  | 1 | 0.175 | 5 | 1  |
| <b>oxazepam</b>               | -0.33 | -0.44 | 0.79  | 0.580  | 1 | 1 | 3 | -3.74 | 0.1   | 1 | 0.85  | 3 | 0  |
| <b>oxybutinin</b>             | 0.63  | -0.25 | 0.96  |        | 1 |   | 3 | -1.04 |       |   | 0.92  | 3 | 1  |
| <b>pantoprazole</b>           | -0.15 | -0.83 | -1.61 |        | 0 | 1 | 1 | -1.13 |       |   | 0.98  | 1 | 0  |

|                       |       |       |       |        |   |   |   |       |       |   |       |   |    |
|-----------------------|-------|-------|-------|--------|---|---|---|-------|-------|---|-------|---|----|
| <b>paracetamol</b>    | -0.79 | -0.24 | -1.33 | -0.463 | 1 | 1 | 1 | -2.66 | 0.84  | 3 | 0.25  | 5 | 0  |
| <b>paroxetine</b>     | 0.06  | -0.09 | -0.91 |        | 1 | 1 | 2 | -2.48 | 0.675 | 2 | 0.94  | 3 | 1  |
| <b>pergolide</b>      | -0.17 | -0.16 | 0.48  | 0.300  | 1 |   |   | -0.78 |       |   | 0.9   | 3 | 1  |
| <b>perindopril</b>    | -0.97 | -0.99 | 0.37  |        | 0 | 1 | 3 | -4.05 |       |   | 0.15  | 5 | -1 |
| <b>phenytoin</b>      | -0.61 | -0.38 | -0.30 | -0.096 | 1 | 1 | 2 | -0.88 | 0.29  | 1 | 0.9   | 3 | 0  |
| <b>pindolol</b>       | -0.05 | -0.37 | -1.28 |        | 1 | 1 | 3 | -2.34 |       |   | 0.4   | 5 | 1  |
| <b>piroxicam</b>      | -1.30 | -1.18 | -0.13 |        | 0 | 1 | 2 | -2.7  | 0.02  | 1 | 0.99  | 1 | -1 |
| <b>prednisolone</b>   | -0.96 | -0.97 | 0.34  |        | 1 |   | 2 | -5.26 | 0.13  | 1 | 0.9   | 3 | 0  |
| <b>progesterone</b>   | -0.08 | -0.20 | 0.90  |        |   | 1 | 3 |       |       |   | 0.975 | 2 | 0  |
| <b>promazine</b>      | 0.16  | 0.04  | 0.96  | 0.880  | 1 |   |   | -2.23 |       |   | 0.94  | 3 | 1  |
| <b>promethazine</b>   | -0.36 | 0.04  | -0.77 |        | 1 |   | 2 | -1.78 |       |   | 0.93  | 3 | 1  |
| <b>propafenone</b>    | 0.42  | -0.39 | 0.27  |        | 0 | 1 | 2 | -2.11 |       |   | 0.97  | 2 | 1  |
| <b>propranolol</b>    | -0.05 | -0.12 | 0.74  | 1.110  | 1 | 1 | 2 | -2.3  | 0.396 | 1 | 0.9   | 3 | 1  |
| <b>quetiapine</b>     | -0.52 | -0.63 | 0.76  |        | 1 | 1 | 2 | -0.46 |       |   | 0.83  | 4 | 1  |
| <b>quinapril</b>      | 0.40  | -0.99 | 0.18  |        | 0 | 1 | 2 | -3.81 | 0.12  | 1 | 0.97  | 2 | -1 |
| <b>risperidone</b>    | -0.68 | -0.44 | -0.35 | -0.020 | 1 | 1 | 3 | -0.87 | 0.26  | 1 | 0.88  | 3 | 1  |
| <b>rizatriptan</b>    | -0.78 | -0.40 | -0.80 | 0.780  | 1 |   | 3 | -2.29 |       |   | 0.14  | 5 | 1  |
| <b>rosuvastatin</b>   | 0.32  | -1.71 | -0.08 |        | 0 | 1 | 3 | -2.95 |       |   | 0.88  | 3 | -1 |
| <b>roxitromicin</b>   | 0.58  | -2.92 | 0.79  |        | 0 | 1 |   | -0.96 | 0.04  | 1 | 0.96  | 2 | 1  |
| <b>rupatadine</b>     | -0.04 | 0.08  | 0.15  |        |   |   |   | -0.25 |       |   | 0.985 | 1 | 1  |
| <b>sertraline</b>     | 0.39  | 0.35  | 0.18  |        | 1 | 1 | 2 | -2.27 | 1.85  | 4 | 0.98  | 1 | 1  |
| <b>sildenafil</b>     | -0.08 | -1.20 | -1.40 |        | 1 | 1 | 3 | -1.17 |       |   | 0.96  | 2 | 0  |
| <b>simvastatin</b>    | -0.27 | -0.62 | 1.55  |        | 1 |   | 3 | -6.29 |       |   | 0.95  | 2 | 0  |
| <b>spironolactone</b> | -0.62 | -0.82 | 1.00  |        | 1 |   | 2 |       | 0.615 | 2 | 0.9   | 3 | 0  |
| <b>sulpiride</b>      | -1.42 | -1.21 | -0.43 |        | 1 | 2 | 2 | -1.77 |       |   | 0.4   | 5 | 1  |
| <b>telmisartan</b>    | 0.33  | -0.46 | 3.03  |        | 1 |   | 4 | -3.34 |       |   | 0.995 | 1 | -1 |
| <b>temazepam</b>      | -0.17 | -0.30 | 0.91  |        | 1 | 1 | 3 | -4.46 | 0.14  | 1 | 0.96  | 2 | 0  |
| <b>theophylline</b>   | -1.09 | -0.56 | -1.32 | -0.341 | 1 | 1 | 3 | -1.4  | 0.697 | 2 | 0.4   | 5 | 0  |
| <b>thioridazine</b>   | -0.07 | -0.37 | 1.43  | 0.285  | 1 |   | 4 | -2.64 |       |   | 0.95  | 2 | 1  |
| <b>tolterodine</b>    | 0.63  | 0.17  | 0.96  |        | 1 |   | 3 | -3.48 |       |   | 0.963 | 2 | 1  |
| <b>trazodone</b>      | -0.06 | -0.13 | 0.74  |        | 1 | 1 | 2 | -0.32 | 0.53  | 2 | 0.92  | 3 | 1  |

|                       |       |       |       |        |   |   |   |       |      |   |       |   |    |
|-----------------------|-------|-------|-------|--------|---|---|---|-------|------|---|-------|---|----|
| <b>tropicamid</b>     | 0.14  | -0.31 | -0.67 |        | 1 |   | 3 | -1.88 |      |   | 0.45  | 5 | 0  |
| <b>valproic acid</b>  | 0.54  | -0.05 | 0.64  |        | 1 | 1 | 4 | -2.38 | 0.05 | 1 | 0.85  | 3 | -1 |
| <b>valsartan</b>      | -0.93 | -1.25 | 1.28  |        | 0 |   | 3 | -3.64 |      |   | 0.955 | 2 | -1 |
| <b>venlafaxine</b>    | 0.36  | 0.02  | 0.05  |        | 1 | 1 | 3 | -2.07 | 3.32 | 4 | 0.27  | 5 | 1  |
| <b>verapamil</b>      | -0.72 | -0.48 | -0.38 | -0.470 | 1 | 1 | 2 | -1.77 | 0.6  | 2 | 0.9   | 3 | 1  |
| <b>zolmitriptane</b>  | -0.86 | -0.37 | -1.17 |        | 1 |   | 3 | -2.32 |      |   | 0.25  | 5 | 1  |
| <b>zolpidem</b>       | -0.29 | -0.05 | -0.24 | -0.480 | 1 | 1 | 3 | -0.43 | 0.15 | 1 | 0.92  | 3 | 0  |
| <b>zopiclone</b>      | -0.87 | -0.92 | 0.49  |        | 0 |   | 2 | -0.5  | 0.51 | 2 | 0.45  | 5 | 0  |
| <b>zuclopenthixol</b> | 0.12  | -0.29 | 1.82  |        | 1 | 1 | 3 | -0.17 | 0.37 | 1 | 0.985 | 1 | 1  |

**Table S2.** Physicochemical properties of APIs (n = 129).

| API                  | a/b/n<br>code <sup>1</sup> | DM   | eH    | eH-eL | eL <sup>2</sup> | HA | HD | log D | log P | MW <sup>3</sup> | pKa   | PSA <sup>4</sup> | Sa <sup>3</sup> | V <sup>3</sup> |
|----------------------|----------------------------|------|-------|-------|-----------------|----|----|-------|-------|-----------------|-------|------------------|-----------------|----------------|
| acebutolol           | 1                          | 2.65 | -9.19 | -8.68 | -5.11           | 5  | 3  | 0.26  | -0.33 | 3.36            | 9.4   | 8.77             | 6.33            | 3.29           |
| aceclofenac          | -1                         | 1.93 | -8.85 | -8.58 | -2.68           | 5  | 2  | 0.44  | 3.54  | 3.54            | 2.6   | 7.56             | 4.44            | 2.84           |
| acenocumarol         | -1                         | 8.94 | -9.74 | -8.27 | -14.71          | 7  | 1  | 0.34  | 2.68  | 3.53            | 4.5   | 10.94            | 4.66            | 2.96           |
| acetylsalicylic acid | -1                         | 5.18 | -9.78 | -9.08 | -6.93           | 4  | 1  | -1.89 | 1.30  | 1.80            | 3.48  | 6.36             | 3.05            | 1.52           |
| aciclovir            | 0                          | 5.69 | -8.76 | -8.27 | -4.89           | 8  | 4  | -1.76 | -1.45 | 2.25            | 5.11  | 10.98            | 3.59            | 1.86           |
| alprazolam           | 0                          | 6.16 | -9.51 | -9.36 | -1.42           | 4  | 0  | 2.5   | 4.68  | 3.09            | 2.37  | 3.81             | 2.94            | 2.69           |
| amiodarone           | 1                          | 5.30 | -7.46 | -4.11 | -33.48          | 3  | 0  | 6.94  | 3.01  | 6.45            | 9.37  | 4.27             | 5.21            | 4.46           |
| amlodipine           | 1                          | 2.88 | -8.66 | -8.32 | -3.35           | 5  | 2  | 2.59  | -1.51 | 4.09            | 8.97  | 9.99             | 5.92            | 3.62           |
| amoxicillin          | -1                         | 4.32 | -9.20 | -8.87 | -3.31           | 8  | 5  | -2.43 | -0.15 | 3.65            | 2.44  | 15.83            | 4.88            | 3.07           |
| astemizol            | 1                          | 1.71 | -7.83 | -7.52 | -3.07           | 5  | 1  | 4.08  | 0.71  | 4.59            | 8.68  | 3.74             | 6.02            | 4.22           |
| atorvastatin         | -1                         | 2.22 | -9.00 | -8.86 | -1.40           | 5  | 4  | 1.11  | 1.54  | 5.63            | 4.29  | 11.18            | 6.75            | 5.21           |
| atropine             | 1                          | 2.48 | -9.42 | -9.46 | 0.41            | 4  | 1  | -0.94 | 1.71  | 2.89            | 9.98  | 4.98             | 4.24            | 2.79           |
| azithromycin         | 1                          |      |       | 0.00  |                 | 13 | 5  | 3.18  | 2.44  |                 | 8.59  | 18.01            |                 |                |
| betaxolol            | 1                          | 1.20 | -8.98 | -9.42 | 4.43            | 4  | 2  | 0.93  | 1.00  | 3.07            | 9.43  | 5.07             | 5.89            | 3.15           |
| bilastine            | 0                          | 2.69 | -8.82 | -8.70 | -1.22           | 6  | 2  | 1.97  | 2.10  | 4.64            | 6.59  | 7.85             | 6.65            | 4.54           |
| biperiden            | 1                          | 2.30 | -9.16 | -9.48 | 3.22            | 2  | 1  | 1.68  | 2.71  | 3.11            | 9.26  | 2.35             | 4.11            | 3.20           |
| bisoprolol           | 1                          | 1.93 | -9.09 | -9.42 | 3.27            | 5  | 2  | 0.4   | 2.13  | 3.25            | 9.42  | 6.00             | 7.05            | 3.31           |
| bromazepam           | 0                          | 2.87 | -9.13 | -9.02 | -1.07           | 4  | 1  | 1.65  | 2.59  | 3.16            | 11.39 | 5.44             | 2.67            | 2.36           |
| bromocriptine        | 0                          | 4.25 | -8.92 | -7.96 | -9.58           | 10 | 3  | 5.07  | 4.48  | 6.69            | 6.44  | 11.82            | 6.06            | 5.64           |
| buspirone            | 0                          | 4.32 | -8.74 | -8.58 | -1.56           | 7  | 0  | 3.35  | 1.18  | 3.86            | 7.72  | 6.96             | 5.19            | 3.71           |
| caffeine             | 0                          | 3.92 | -9.00 | -8.47 | -5.36           | 6  | 0  | -0.13 | -1.06 | 1.94            | 0.52  | 5.35             | 3.41            | 1.68           |
| capecitabine         | -1                         | 4.97 | -9.72 | -8.38 | -13.37          | 9  | 3  | -0.73 | 0.53  | 3.59            | 5.41  | 12.07            | 5.37            | 3.04           |
| captopril            | -1                         | 1.87 | -9.35 | -9.45 | 1.05            | 3  | 2  | -3.15 | 0.30  | 2.17            | 3.59  | 5.76             | 3.63            | 1.92           |
| carbamazepine        | 0                          | 3.25 | -9.05 | -8.53 | -5.19           | 3  | 2  | 2.67  | 2.10  | 2.36            | 13.94 | 4.63             | 2.85            | 2.19           |
| carbegoline          | 1                          | 3.58 | -8.39 | -8.15 | -2.38           | 7  | 2  | -0.19 | 0.29  | 4.24            | 9.41  | 7.17             | 6.41            | 4.10           |
| carvedilol           | 0                          | 3.15 | -8.56 | -8.35 | -2.09           | 5  | 3  | 3.29  | -2.04 | 4.20            | 8.24  | 7.57             | 5.49            | 3.97           |
| cefuroxime           | -1                         | 2.73 | -8.76 | -7.44 | -13.17          | 4  | 12 | 2.91  | -2.08 | 4.24            | 2.59  | 19.91            | 4.26            | 3.75           |
| celecoxib            | 0                          | 4.09 | -9.93 | -8.51 | -14.21          | 3  | 1  | 4.21  | 1.02  | 3.81            | 9.68  | 7.80             | 5.10            | 2.97           |

|                           |    |       |        |        |        |    |   |       |       |        |       |       |      |      |
|---------------------------|----|-------|--------|--------|--------|----|---|-------|-------|--------|-------|-------|------|------|
| <b>celiprolol</b>         | 1  | 2.01  | -9.24  | -8.78  | -4.56  | 5  | 3 | 0.22  | -0.45 | 3.65   | 9.5   | 9.09  | 6.62 | 3.59 |
| <b>cephalexin</b>         | -1 | 5.35  | -9.59  | -8.97  | -6.25  | 5  | 3 | -2.44 | -1.31 | 3.47   | 3.12  | 3.25  | 4.24 | 2.95 |
| <b>cetirizine</b>         | -1 | 3.56  | -8.97  | -8.75  | -2.20  | 5  | 1 | -1.13 | 2.11  | 3.75   | 3.46  | 5.30  | 5.01 | 3.37 |
| <b>chloramphenikol</b>    | 0  | -9.08 | -10.34 | -9.01  | -13.37 | 7  | 3 | 1.02  | -0.25 | 3.23   | 11.03 | 11.54 | 4.50 | 2.44 |
| <b>chlorpromazine</b>     | 1  | 7.13  | -6.83  | -6.90  | 0.74   | 2  | 0 | 3.26  | 3.77  | 3.19   | 9.41  | 3.18  | 3.04 | 2.62 |
| <b>chlortalidone</b>      | 0  | 4.04  | -9.45  | -8.68  | -7.73  | 6  | 4 | -0.74 | -0.63 | 3.19   | 9.57  | 11.79 | 3.79 | 2.51 |
| <b>cimetidine</b>         | 0  | 11.01 | -8.75  | -8.48  | -2.76  | 6  | 3 | -0.25 | -0.59 | 2.52   | 7.07  | 11.42 | 2.94 | 2.29 |
| <b>ciprofloxacin</b>      | 0  | 6.93  | -8.72  | -7.94  | -7.85  | 6  | 2 | -0.85 | -1.85 | 331.35 | 7.56  | 7.29  | 4.25 | 2.84 |
| <b>cisapride</b>          | 0  | 1.68  | -8.72  | -8.54  | -1.86  | 7  | 3 | 2.6   | 2.25  | 4.66   | 7.47  | 8.61  | 6.66 | 4.11 |
| <b>clarithromycin</b>     | 0  |       |        | 0.00   |        | 14 | 4 | 2.33  | 3.16  |        | 8.16  | 18.29 |      |      |
| <b>clindamycin</b>        | 1  |       |        | 0.00   |        | 7  | 4 | 0.48  | 1.59  |        | 8.73  | 10.58 |      |      |
| <b>clobazam</b>           | 0  | 4.18  | -9.21  | -8.66  | -5.52  | 4  | 0 | 1.59  | -1.40 | 3.01   | 8.59  | 4.03  | 4.02 | 2.58 |
| <b>clonidine</b>          | 0  | 3.51  | -8.90  | -8.48  | -4.25  | 3  | 2 | -0.68 | 0.28  | 2.30   | 8.1   | 3.64  | 3.10 | 1.86 |
| <b>clorazepate</b>        | -1 | 3.51  | -9.12  | -9.01  | -1.13  | 6  | 4 | 1.55  | 2.75  | 3.15   | 5.3   | 10.22 | 2.91 | 2.57 |
| <b>clozapine</b>          | 0  | 1.13  | -8.78  | -8.51  | -2.69  | 1  | 0 | 4.86  | 1.77  | 2.87   | 7.33  | 0.32  | 3.81 | 2.90 |
| <b>cypheptadine</b>       | 1  | 1.98  | -8.63  | -8.83  | 2.03   | 3  | 1 | 2.44  | 1.16  | 2.65   | 8.95  | 2.76  | 3.89 | 2.66 |
| <b>desloratidine</b>      | 1  | 3.04  | -9.13  | -8.83  | -2.94  | 2  | 1 | 4.1   | 0.07  | 3.11   | 10.27 | 2.49  | 3.75 | 2.88 |
| <b>diazepam</b>           | 0  | 3.57  | -9.06  | -8.96  | -1.00  | 3  | 0 | 2.91  | 3.01  | 2.85   | 3.4   | 3.27  | 2.80 | 2.50 |
| <b>digoxin</b>            | 0  | 5.58  | -8.45  | -7.28  | -11.68 | 14 | 6 | 0.85  | 2.67  | 7.81   | 13.5  | 20.31 | 7.66 | 7.05 |
| <b>dihydroergotamine</b>  | 0  | 3.90  | -8.60  | -8.50  | -1.05  | 6  | 3 | 2.05  | -2.11 | 4.78   | 7.22  | 11.82 | 5.13 | 4.33 |
| <b>diphenhydramin</b>     | 1  | 0.52  | -9.18  | -9.41  | 2.36   | 2  | 0 | 2.29  | 2.09  | 2.55   | 8.76  | 1.25  | 4.92 | 2.65 |
| <b>doxazosin</b>          | 0  | 4.02  | -8.67  | -7.54  | -11.34 | 9  | 1 | 0.6   | 2.14  | 4.09   | 6.52  | 12.27 | 4.93 | 3.46 |
| <b>doxycycline</b>        | 0  | 11.15 | -9.00  | -7.85  | -11.51 | 10 | 7 | -3.32 | -1.86 | 4.44   | 7.67  | 18.16 | 4.43 | 3.68 |
| <b>drotaverine</b>        | 0  | 3.56  | -8.36  | -7.99  | -3.63  | 5  | 1 | 6.12  | -1.51 | 3.98   | 6.17  | 4.90  | 6.39 | 3.89 |
| <b>enalapril</b>          | -1 | 3.46  | -9.37  | -9.38  | 0.20   | 7  | 2 | -2.35 | 2.30  | 3.75   | 3.15  | 9.59  | 4.19 | 3.48 |
| <b>eplerenone</b>         |    | 3.20  | -10.28 | -10.00 | -2.81  | 6  | 0 | 1.05  | 1.96  | 4.15   |       | 7.89  | 4.43 | 3.73 |
| <b>escitalopram</b>       | 1  | 2.57  | -9.21  | -8.37  | -8.44  | 3  | 0 | 0.39  | 0.87  | 3.24   | 9.57  | 3.63  | 5.46 | 3.08 |
| <b>estradiol benzoate</b> | 0  | 5.95  | -10.11 | -9.97  | -1.40  | 4  | 0 | 2.51  | 4.20  | 3.73   |       | 6.04  | 4.77 | 3.58 |
| <b>estrone</b>            | 0  | 5.76  | -10.17 | -9.95  | -2.21  | 6  | 1 | 2.53  | 2.86  | 4.02   | 10.25 | 9.77  | 4.73 | 3.67 |
| <b>famotidine</b>         | 0  | 1.01  | -8.55  | -7.97  | -5.85  | 9  | 8 | -1.02 | -1.11 | 3.36   | 7.93  | 23.78 | 4.85 | 2.69 |
| <b>fexofenadine</b>       | 0  | 2.61  | -8.98  | -8.75  | -2.28  | 5  | 3 | 2.3   | 3.81  | 5.02   | 6.93  | 8.10  | 6.27 | 4.87 |

|                               |    |      |        |        |        |   |   |       |       |      |       |       |      |      |
|-------------------------------|----|------|--------|--------|--------|---|---|-------|-------|------|-------|-------|------|------|
| <b>fluoxetine</b>             | 1  | 4.43 | -9.41  | -9.02  | -3.95  | 2 | 1 | 1.56  | 1.93  | 3.09 | 10.05 | 2.13  | 4.99 | 2.71 |
| <b>flupenthixol</b>           | 0  | 4.80 | -7.61  | -6.76  | -8.51  | 3 | 1 | 4.42  | 5.33  | 4.30 | 7.05  | 5.20  | 5.85 | 3.65 |
| <b>furosemide</b>             | -1 | 3.27 | -8.92  | -7.90  | -10.23 | 7 | 4 | -0.12 | -0.24 | 3.11 | 3.04  | 13.10 | 4.19 | 2.42 |
| <b>gliclazide</b>             | -1 | 5.31 | -9.38  | -8.30  | -10.80 | 6 | 2 | -0.28 | 1.90  | 3.23 | 6.07  | 8.69  | 4.91 | 2.86 |
| <b>haloperidol</b>            | 0  | 2.85 | -9.22  | -8.75  | -4.64  | 3 | 1 | 2.11  | 1.31  | 3.76 | 8.04  | 4.05  | 5.29 | 3.37 |
| <b>hydrocortisone acetate</b> | 0  | 4.23 | -10.14 | -10.06 | -0.86  | 4 | 0 | 4.53  | 4.20  | 3.73 | 12.42 | 6.04  | 4.77 | 3.58 |
| <b>hydroxyzine</b>            | 0  | 1.27 | -8.81  | -8.75  | -0.65  | 4 | 1 | 2     | 1.23  | 3.75 | 6.62  | 3.59  | 5.48 | 3.54 |
| <b>ibuprofen</b>              | -1 | 1.91 | -9.39  | -9.58  | 1.92   | 2 | 1 | 0.8   | 3.83  | 2.06 | 4.41  | 3.73  | 2.52 | 2.42 |
| <b>indomethacin</b>           | -1 | 2.98 | -8.69  | -8.12  | -5.75  | 5 | 1 | -0.16 | -1.43 | 3.58 | 3.96  | 6.36  | 4.94 | 3.05 |
| <b>ketoprofen</b>             | -1 | 4.50 | -9.96  | -9.56  | -3.99  | 3 | 1 | -0.25 | 2.56  | 2.54 | 4.23  | 5.44  | 4.07 | 2.36 |
| <b>ketotifen</b>              | 1  | 4.07 | -9.08  | -8.07  | -10.10 | 2 | 0 | 3.28  | 0.26  | 3.09 | 8.84  | 4.86  | 3.89 | 2.87 |
| <b>lamotrigine</b>            | 0  | 2.75 | -8.22  | -7.66  | -5.61  | 5 | 4 | -0.19 | 1.38  | 2.56 | 5.39  | 9.07  | 3.15 | 1.93 |
| <b>levocetizine</b>           | -1 | 1.73 | -9.00  | -8.83  | -1.67  | 5 | 1 | -1.13 | 3.48  | 3.89 | 3.46  | 5.30  | 5.59 | 3.55 |
| <b>levofloxacin</b>           | -1 | 7.21 | -8.72  | -7.88  | -8.37  | 7 | 1 | 0.65  | 0.62  | 3.61 | 5.19  | 7.33  | 4.75 | 3.06 |
| <b>loperamide</b>             | 0  | 4.65 | -8.52  | -8.50  | -0.23  | 4 | 1 | 3.53  | 5.01  | 4.77 | 7.76  | 4.38  | 4.89 | 4.33 |
| <b>loratadine</b>             | 0  | 2.90 | -9.02  | -8.36  | -6.59  | 4 | 0 | 5.94  | 0.30  | 3.69 | 4.27  | 4.24  | 4.93 | 3.31 |
| <b>lorazepam</b>              | 0  | 6.40 | -7.77  | -7.65  | -1.17  | 4 | 2 | 2.47  | 3.42  | 3.21 | 10.8  | 6.17  | 2.58 | 2.53 |
| <b>medazepam</b>              | 0  | 4.08 | -8.34  | -8.28  | -0.59  | 2 | 0 | 4.42  | 4.29  | 3.30 | 6.18  | 1.56  | 2.80 | 2.49 |
| <b>meloxicam</b>              | -1 | 5.35 | -7.64  | -6.38  | -12.59 | 7 | 2 | -0.09 | -1.16 | 3.51 | 4.5   | 13.62 | 4.03 | 2.71 |
| <b>methyldopa</b>             | 0  | 1.56 | -9.07  | -9.34  | 2.75   | 5 | 5 | -2.38 | -1.46 | 2.11 | 5.57  | 10.38 | 3.34 | 1.85 |
| <b>mianserin</b>              | 1  | 0.56 | -8.66  | -8.93  | 2.68   | 2 | 0 | 2.76  | 0.94  | 2.64 | 8.26  | 0.65  | 3.65 | 2.64 |
| <b>midazolam</b>              | 0  | 3.03 | -9.24  | -9.11  | -1.28  | 3 | 0 | 3.92  | 3.41  | 3.26 | 6.03  | 2.53  | 3.04 | 2.76 |
| <b>mirtazapine</b>            | 0  | 1.76 | -8.79  | -8.81  | 0.19   | 3 | 0 | 1.97  | 1.16  | 2.65 | 8.1   | 1.94  | 3.57 | 2.60 |
| <b>montelukast</b>            | -1 | 3.34 | -7.46  | -6.83  | -6.36  | 4 | 2 | 5.19  | 4.13  | 5.88 | 4.76  | 7.04  | 7.27 | 5.47 |
| <b>naproxen</b>               | -1 | 1.92 | -9.10  | -8.82  | -2.79  | 3 | 1 | 0.47  | 2.99  | 2.30 | 4.84  | 4.65  | 3.89 | 2.15 |
| <b>nebivolol</b>              | 1  | 2.46 | -9.05  | -8.94  | -1.07  | 5 | 3 | 2.4   | -1.03 | 4.05 | 8.65  | 7.10  | 5.05 | 3.53 |
| <b>olanzapine</b>             | 0  | 7.55 | -9.20  | -8.41  | -7.85  | 6 | 1 | -1.48 | -1.56 | 3.28 | 7.33  | 8.41  | 6.19 | 3.01 |
| <b>oxazepam</b>               | 0  | 3.38 | -9.09  | -8.98  | -1.06  | 4 | 2 | 2.32  | 2.91  | 2.87 | 10.94 | 6.17  | 2.72 | 2.72 |
| <b>oxybutinin</b>             | 0  | 1.02 | -9.18  | -9.11  | -0.66  | 3 | 1 | 5.53  | 3.24  | 3.57 | 8.24  | 4.98  | 5.82 | 3.61 |
| <b>pantoprazole</b>           | 0  | 7.25 | -9.09  | -8.19  | -9.03  | 6 | 1 | 1.5   | -1.89 | 3.83 | 8.33  | 8.63  | 5.08 | 3.01 |
| <b>paracetamol</b>            | 0  | 3.28 | -8.58  | -8.65  | 0.73   | 3 | 2 | 0.34  | -1.32 | 1.51 | 9.86  | 4.93  | 3.03 | 1.39 |



|                       |    |       |        |        |        |    |   |       |       |      |       |       |      |      |
|-----------------------|----|-------|--------|--------|--------|----|---|-------|-------|------|-------|-------|------|------|
| <b>paroxetine</b>     | 1  | 2.12  | -9.00  | -9.04  | 0.34   | 4  | 1 | 1.19  | -0.49 | 3.31 | 9.68  | 3.97  | 4.12 | 2.99 |
| <b>pergolide</b>      | 0  | 1.93  | -8.35  | -8.50  | 1.51   | 2  | 1 | 2.29  | 2.29  | 3.14 | 7.98  | 4.43  | 4.50 | 3.09 |
| <b>perindopril</b>    | -1 | 6.26  | -9.78  | -10.07 | 2.88   | 7  | 2 | -0.01 | 2.06  | 3.68 | 3.15  | 9.59  | 5.43 | 3.52 |
| <b>phenytoin</b>      | 0  | 2.98  | -9.84  | -9.55  | -2.94  | 4  | 2 | 2.48  | 0.73  | 2.52 | 6.32  | 5.82  | 3.32 | 2.26 |
| <b>pindolol</b>       | 1  | 3.19  | -8.47  | -8.53  | 0.63   | 3  | 3 | 0.19  | -1.23 | 2.48 | 9.54  | 5.73  | 4.60 | 2.44 |
| <b>piroxicam</b>      | -1 | 11.24 | -8.63  | -8.84  | 2.05   | 7  | 2 | -2.14 | 1.07  | 3.33 | 4.5   | 10.80 | 2.66 | 2.50 |
| <b>prednisolone</b>   | 0  | 3.68  | -10.01 | -9.54  | -4.70  | 5  | 3 | 1.49  | 2.01  | 3.46 | 12.46 | 9.48  | 3.96 | 3.14 |
| <b>progesterone</b>   |    | 5.88  | -9.29  | -9.03  | -2.60  | 3  | 1 | 6.24  | 3.12  | 3.77 |       | 4.65  | 4.54 | 3.60 |
| <b>promazine</b>      | 1  | 2.86  | -7.54  | -7.15  | -3.93  | 2  | 0 | 2.67  | 3.25  | 2.84 | 9.43  | 3.18  | 2.93 | 2.53 |
| <b>promethazine</b>   | 1  | 3.40  | -7.83  | -7.76  | -0.65  | 2  | 0 | 3.2   | -0.20 | 2.84 | 8.98  | 3.18  | 4.36 | 2.76 |
| <b>propafenone</b>    | 1  | 2.97  | -8.77  | -8.59  | -1.75  | 4  | 2 | 2.06  | 1.86  | 3.29 | 9.31  | 5.86  | 5.36 | 3.28 |
| <b>propranolol</b>    | 1  | 1.53  | -8.36  | -7.79  | -5.71  | 3  | 2 | 1.27  | 2.80  | 2.59 | 9.5   | 4.15  | 3.09 | 2.56 |
| <b>quetiapine</b>     | 0  | 1.57  | -8.68  | -7.95  | -7.24  | 5  | 1 | 1.55  | 2.84  | 3.84 | 6.74  | 7.36  | 5.42 | 3.55 |
| <b>quinapril</b>      | -1 | 5.13  | -9.50  | -9.59  | 0.91   | 5  | 2 | 0.85  | 1.69  | 4.39 | 3.39  | 9.59  | 6.10 | 4.10 |
| <b>risperidone</b>    | 0  | 3.42  | -8.93  | -8.06  | -8.76  | 6  | 0 | 2.27  | 0.63  | 4.10 | 8.07  | 6.19  | 4.91 | 3.73 |
| <b>rizatriptan</b>    | 1  | 1.76  | -8.14  | -7.45  | -6.90  | 4  | 1 | 2.68  | -0.27 | 3.12 | 9.49  | 5.91  | 4.26 | 2.90 |
| <b>rosuvastatin</b>   | -1 | 5.66  | -9.19  | -8.13  | -10.63 | 8  | 3 | -2.63 | 1.18  | 4.82 | 4.25  | 14.09 | 6.89 | 4.12 |
| <b>roxitromicin</b>   | 0  |       |        | 0.00   |        | 16 | 5 | 2.9   | 2.90  |      | 8.16  | 21.69 |      |      |
| <b>rupatadine</b>     | 0  | 1.61  | -8.99  | -8.35  | -6.43  | 3  | 0 | 5.97  | 1.63  | 4.15 | 6.95  | 2.90  | 4.97 | 3.94 |
| <b>sertraline</b>     | 1  | 2.87  | -9.19  | -9.09  | -0.94  | 1  | 1 | 2.77  | 1.68  | 3.06 | 9.47  | 1.20  | 4.21 | 2.72 |
| <b>sildenafil</b>     | 0  | 5.84  | -8.91  | -9.86  | 9.47   | 8  | 1 | 2.27  | -1.47 | 4.75 | 6.03  | 10.91 | 6.47 | 4.20 |
| <b>simvastatin</b>    | 0  | 5.78  | -9.10  | -9.33  | 2.25   | 5  | 1 | 4.41  | 4.43  | 4.19 | 13.49 | 7.28  | 5.71 | 4.10 |
| <b>spironolactone</b> |    | 1.67  | -9.76  | -8.96  | -7.98  | 4  | 0 | 3.12  | 3.33  | 4.17 |       | 8.57  | 4.94 | 3.82 |
| <b>sulpiride</b>      | 1  | 3.65  | -7.89  | -6.22  | -16.74 | 7  | 3 | -1.12 | 0.48  | 3.41 | 8.97  | 11.01 | 5.08 | 3.02 |
| <b>telmisartan</b>    | -1 | 0.71  | -8.56  | -8.02  | -5.48  | 6  | 1 | 4.76  | 7.39  | 5.01 | 3.86  | 6.31  | 6.39 | 4.69 |
| <b>temazepam</b>      | 0  | 2.48  | -9.17  | -9.09  | -0.83  | 4  | 1 | 2.15  | 3.15  | 3.01 | 11.66 | 5.29  | 2.84 | 2.53 |
| <b>theophylline</b>   | 0  | 3.47  | -9.10  | -8.53  | -5.77  | 6  | 1 | -0.2  | -1.31 | 1.80 | 8.6   | 6.93  | 3.02 | 1.50 |
| <b>thioridazine</b>   | 0  | 0.98  | -7.92  | -7.65  | -2.68  | 2  | 0 | 3.94  | 4.18  | 3.71 | 9.84  | 5.71  | 4.89 | 3.50 |
| <b>tolterodine</b>    | 1  | 2.18  | -8.95  | -9.17  | 2.20   | 2  | 1 | 2.94  | 3.24  | 3.25 | 10.68 | 2.35  | 5.73 | 3.44 |
| <b>trazodone</b>      | 0  | 3.41  | -8.50  | -7.88  | -6.21  | 6  | 0 | 1.58  | 2.80  | 3.72 | 7.52  | 4.24  | 5.01 | 3.36 |
| <b>tropicamid</b>     | 0  | 4.06  | -9.68  | -9.40  | -2.81  | 3  | 1 | 1.15  | -0.01 | 2.84 | 5.32  | 5.34  | 4.15 | 2.76 |

|                       |    |      |        |        |       |   |   |       |       |      |      |       |      |      |
|-----------------------|----|------|--------|--------|-------|---|---|-------|-------|------|------|-------|------|------|
| <b>valproic acid</b>  | -1 | 1.93 | -11.19 | -12.19 | 10.01 | 2 | 1 | 0.16  | 2.61  | 1.44 | 4.82 | 3.73  | 3.75 | 5.54 |
| <b>valsartan</b>      | -1 | 2.92 | -9.69  | -9.05  | -6.39 | 8 | 2 | 0.05  | 3.88  | 4.22 | 3.56 | 11.21 | 5.46 | 3.92 |
| <b>venlafaxine</b>    | 1  | 3.25 | -9.02  | -9.29  | 2.73  | 3 | 1 | 1.07  | 1.44  | 2.77 | 9.27 | 3.27  | 4.44 | 2.85 |
| <b>verapamil</b>      | 1  | 5.44 | -8.76  | -8.85  | 0.90  | 6 | 0 | 2.33  | 0.57  | 4.55 | 8.97 | 6.40  | 7.51 | 4.53 |
| <b>zolmitriptane</b>  | 1  | 4.09 | -8.73  | -8.57  | -1.57 | 5 | 2 | -0.44 | -1.01 | 2.89 | 9.52 | 5.74  | 4.68 | 2.74 |
| <b>zolpidem</b>       | 0  | 6.69 | -8.37  | -8.33  | -0.45 | 4 | 0 | 3.02  | 0.86  | 3.07 | 6.77 | 3.76  | 3.33 | 2.94 |
| <b>zopiclone</b>      | 0  | 5.47 | -9.13  | -8.95  | -1.78 | 9 | 0 | -42   | 2.31  | 3.89 | 6.7  | 9.18  | 3.36 | 3.86 |
| <b>zuclopenthixol</b> | 0  | 2.45 | -7.57  | -7.12  | -4.53 | 3 | 1 | 5.06  | 4.97  | 3.97 | 7.03 | 5.20  | 5.58 | 3.55 |

1 – code describing the acid-base properties: (-1) - acids; (0) - neutral drugs; (1) - bases

2 – value multiplied by 10

3 – value divided by 100

4 – value divided by 10

**Table S3.** Chromatographic data and their derivatives obtained from the NP TLC experiment for 129 APIs.

| API                  | C <sub>NP</sub> <sup>*</sup> | NP <sup>**</sup> | NP/C | NP/PSA | R <sub>M</sub> NP | R <sub>M</sub> NP | R <sub>M</sub> NP/C | R <sub>M</sub> NP/PSA | R <sub>M</sub> NP/PB | R <sub>M</sub> NP/logP | R <sub>M</sub> NP/B2 | NP/B2  | NP/PB | NP/logP |
|----------------------|------------------------------|------------------|------|--------|-------------------|-------------------|---------------------|-----------------------|----------------------|------------------------|----------------------|--------|-------|---------|
| acebutolol           | 0.45                         | 0.46             | 1.02 | 0.52   | 0.07              | 0.09              | 0.80                | 0.0008                | 0.268                | -0.2110                | -0.081               | -0.54  | 1.77  | -1.39   |
| aceclofenac          | 0.89                         | 0.90             | 1.01 | 1.19   | -0.95             | -0.91             | 1.05                | -0.0126               | -0.964               | -0.2696                | 1.439                | -1.36  | 0.91  | 0.25    |
| acenocumarol         | 0.99                         | 0.98             | 0.99 | 0.90   | -1.69             | -2.00             | 0.85                | -0.0154               | -1.712               | -0.6307                | 1.404                | -0.81  | 0.99  | 0.37    |
| acetylsalicylic acid | 0.89                         | 0.90             | 1.01 | 1.41   | -0.93             | -0.91             | 1.02                | -0.0146               | -0.935               | -0.7159                | 1.978                | -1.90  | 0.90  | 0.69    |
| aciclovir            | 0.73                         | 0.73             | 0.99 | 0.66   | -0.42             | -0.43             | 0.97                | -0.0038               | -2.005               | 0.2903                 | 0.348                | -0.60  | 3.45  | -0.50   |
| alprazolam           | 0.85                         | 0.86             | 1.01 | 2.25   | -0.79             | -0.75             | 1.05                | -0.0207               | -0.985               | -0.1685                | 12.466               | -13.60 | 1.08  | 0.18    |
| amiodarone           | 0.55                         | 0.6              | 1.09 | 1.41   | -0.18             | -0.09             | 2.02                | -0.0041               | -0.183               | -0.0585                | 1.296                | -4.42  | 0.63  | 0.20    |
| amlodipine           | 0.56                         | 0.56             | 1.00 | 0.56   | -0.10             | -0.10             | 1.00                | -0.0010               | -0.107               | 0.0694                 | 0.100                | -0.53  | 0.57  | -0.37   |
| amoxicillin          | 0.68                         | 0.68             | 1.00 | 0.43   | -0.33             | -0.33             | 1.00                | -0.0021               | -1.637               | 2.1824                 | 0.165                | -0.34  | 3.40  | -4.53   |
| astemizol            | 0.62                         | 0.61             | 0.98 | 1.63   | -0.19             | -0.21             | 0.91                | -0.0052               | -0.201               | -0.2736                | 3.791                | -11.90 | 0.63  | 0.86    |
| atorvastatin         | 0.9                          | 0.9              | 1.00 | 0.81   | -0.95             | -0.95             | 1.00                | -0.0085               | -0.974               | -0.6196                | 0.769                | -0.72  | 0.92  | 0.58    |
| atropine             | 0.27                         | 0.26             | 0.96 | 0.52   | 0.45              | 0.43              | 1.05                | 0.0091                | 2.524                | 0.2656                 | -1.822               | -1.04  | 1.44  | 0.15    |
| azithromycin         | 0.63                         | 0.63             | 1.00 | 0.35   | -0.23             | -0.23             | 1.00                | -0.0013               | -0.797               | -0.0947                | 0.099                | -0.27  | 2.17  | 0.26    |
| betaxolol            | 0.66                         | 0.65             | 0.98 | 1.28   | -0.27             | -0.29             | 0.93                | -0.0053               | -0.538               | -0.2688                | 1.016                | -2.46  | 1.30  | 0.65    |
| bilastine            | 0.46                         | 0.44             | 0.96 | 0.56   | 0.10              | 0.07              | 1.50                | 0.0013                | 0.120                | 0.0499                 | -0.148               | -0.62  | 0.51  | 0.21    |
| biperiden            | 0.68                         | 0.65             | 0.96 | 2.77   | -0.27             | -0.33             | 0.82                | -0.0115               | -0.448               | -0.0992                | -1.568               | 3.79   | 1.08  | 0.24    |
| bisoprolol           | 0.67                         | 0.66             | 0.98 | 1.09   | -0.28             | -0.31             | 0.91                | -0.0046               | -0.928               | -0.1307                | 0.675                | -1.59  | 2.18  | 0.31    |
| bromazepam           | 0.87                         | 0.90             | 1.03 | 1.65   | -0.93             | -0.83             | 1.13                | -0.0171               | -1.329               | -0.3593                | 2.885                | -2.77  | 1.28  | 0.35    |
| bromocriptine        | 0.95                         | 0.96             | 1.01 | 0.81   | -1.38             | -1.28             | 1.08                | -0.0117               | -1.484               | -0.3081                | 1.027                | -0.71  | 1.03  | 0.21    |
| buspirone            | 0.57                         | 0.58             | 1.01 | 0.83   | -0.13             | -0.12             | 1.07                | -0.0019               | -0.138               | -0.1113                | 0.231                | -1.01  | 0.61  | 0.49    |
| caffeine             | 0.82                         | 0.82             | 1.00 | 1.53   | -0.66             | -0.66             | 1.00                | -0.0123               | -2.195               | 0.6213                 | 2.130                | -2.65  | 2.73  | -0.77   |
| capecitabine         | 0.92                         | 0.92             | 1.00 | 0.76   | -1.06             | -1.06             | 1.00                | -0.0088               | -1.768               | -2.0013                | 0.766                | -0.66  | 1.53  | 1.74    |
| captopril            | 0.77                         | 0.74             | 0.96 | 1.28   | -0.45             | -0.52             | 0.87                | -0.0079               | -1.652               | -1.5142                | 1.212                | -1.97  | 2.69  | 2.47    |
| carbamazepine        | 0.95                         | 0.95             | 0.99 | 2.04   | -1.24             | -1.28             | 0.97                | -0.0267               | -1.625               | -0.5881                | 6.357                | -4.86  | 1.24  | 0.45    |
| carbegoline          | 0.68                         | 0.68             | 1.00 | 0.95   | -0.33             | -0.33             | 1.00                | -0.0046               | -0.798               | -1.1288                | 0.546                | -1.13  | 1.66  | 2.34    |
| carvedilol           | 0.73                         | 0.9              | 1.23 | 1.19   | -0.95             | -0.43             | 2.21                | -0.0126               | -0.974               | 0.4678                 | 1.437                | -1.36  | 0.92  | -0.44   |
| cefuroxime           | 0.97                         | 0.98             | 1.01 | 0.49   | -1.69             | -1.51             | 1.12                | -0.0085               | -3.380               | 0.8126                 | 0.641                | -0.37  | 1.96  | -0.47   |
| celecoxib            | 0.98                         | 0.99             | 1.01 | 1.27   | -2.00             | -1.69             | 1.18                | -0.0256               | -2.057               | -1.9565                | 2.848                | -1.41  | 1.02  | 0.97    |
| celiprolol           | 0.45                         | 0.46             | 1.02 | 0.51   | 0.07              | 0.09              | 0.80                | 0.0008                | 0.253                | -0.1547                | -0.077               | -0.51  | 1.67  | -1.02   |
| cephalexin           | 0.9                          | 0.9              | 1.00 | 2.77   | -0.95             | -0.95             | 1.00                | -0.0293               | -6.816               | 0.7284                 | -35.766              | 33.73  | 6.43  | -0.69   |

|                           |      |      |      |       |       |       |      |         |        |         |         |        |      |       |
|---------------------------|------|------|------|-------|-------|-------|------|---------|--------|---------|---------|--------|------|-------|
| <b>cetirizine</b>         | 0.64 | 0.65 | 1.01 | 1.22  | -0.26 | -0.25 | 1.04 | -0.0049 | -0.279 | -0.1229 | 0.861   | -2.14  | 0.69 | 0.31  |
| <b>chloramphenikol</b>    | 0.99 | 0.97 | 0.98 | 0.84  | -1.51 | -2.00 | 0.76 | -0.0131 | -2.745 | 6.0386  | 1.162   | -0.75  | 1.76 | -3.88 |
| <b>chlorthalidone</b>     | 0.43 | 0.43 | 0.99 | 1.34  | 0.13  | 0.12  | 1.07 | 0.0041  | 0.146  | 0.0348  | 3.408   | 11.03  | 0.47 | 0.11  |
| <b>cimetidine</b>         | 0.96 | 0.96 | 0.99 | 0.81  | -1.33 | -1.38 | 0.96 | -0.0113 | -1.769 | 2.1060  | 0.991   | -0.71  | 1.27 | -1.52 |
| <b>ciprofloxacin</b>      | 0.64 | 0.67 | 1.05 | 0.59  | -0.31 | -0.25 | 1.23 | -0.0027 | -1.809 | 0.5213  | 0.240   | -0.52  | 3.94 | -1.14 |
| <b>cisapride</b>          | 0.11 | 0.11 | 1.00 | 0.15  | 0.91  | 0.91  | 1.00 | 0.0125  | 3.027  | -0.4908 | -1.467  | -0.18  | 0.37 | -0.06 |
| <b>clarithromycin</b>     | 0.64 | 0.63 | 0.98 | 0.73  | -0.23 | -0.25 | 0.93 | -0.0027 | -0.237 | -0.1027 | 0.279   | -0.76  | 0.65 | 0.28  |
| <b>clindamycin</b>        | 0.99 | 0.99 | 0.99 | 0.54  | -1.82 | -2.00 | 0.91 | -0.0099 | -2.596 | -0.5751 | 0.764   | -0.41  | 1.41 | 0.31  |
| <b>clobazam</b>           | 0.69 | 0.66 | 0.96 | 0.62  | -0.29 | -0.35 | 0.83 | -0.0027 | -0.310 | -0.1812 | 0.252   | -0.58  | 0.71 | 0.42  |
| <b>clonidine</b>          | 0.95 | 0.95 | 1.00 | 2.36  | -1.28 | -1.28 | 1.00 | -0.0318 | -1.504 | 0.9134  | 13.161  | -9.78  | 1.12 | -0.68 |
| <b>clorazepate</b>        | 0.49 | 0.50 | 1.02 | 1.37  | 0.00  | 0.02  | 0.00 | 0.0000  | 0.000  | 0.0000  | 0.000   | -14.00 | 1.67 | 1.79  |
| <b>clozapine</b>          | 0.94 | 0.94 | 1.00 | 0.92  | -1.19 | -1.19 | 1.00 | -0.0117 | -1.226 | -0.4345 | 1.099   | -0.86  | 0.96 | 0.34  |
| <b>ciproheptadine</b>     | 0.45 | 0.46 | 1.01 | 14.04 | 0.08  | 0.09  | 0.90 | 0.0242  | 0.079  | 0.0443  | 0.158   | 0.92   | 0.46 | 0.26  |
| <b>desloratidine</b>      | 0.45 | 0.43 | 0.94 | 1.54  | 0.13  | 0.09  | 1.51 | 0.0048  | 0.135  | 0.1132  | 1.251   | 4.05   | 0.44 | 0.37  |
| <b>diazepam</b>           | 0.36 | 0.35 | 0.97 | 1.40  | 0.27  | 0.25  | 1.08 | 0.0108  | 0.318  | 3.8406  | 1.813   | 2.36   | 0.41 | 5.00  |
| <b>digoxin</b>            | 0.95 | 0.95 | 0.99 | 2.89  | -1.24 | -1.28 | 0.97 | -0.0378 | -1.260 | -0.4103 | -50.868 | 38.92  | 0.96 | 0.31  |
| <b>dihydroergotamine</b>  | 0.80 | 0.77 | 0.96 | 0.38  | -0.51 | -0.60 | 0.85 | -0.0025 | -2.050 | -0.1920 | 0.190   | -0.28  | 3.06 | 0.29  |
| <b>diphenhydramin</b>     | 0.72 | 0.75 | 1.04 | 0.63  | -0.48 | -0.41 | 1.16 | -0.0040 | -0.513 | 0.2261  | 0.355   | -0.56  | 0.81 | -0.36 |
| <b>doxazosin</b>          | 0.42 | 0.33 | 0.77 | 2.61  | 0.32  | 0.14  | 2.26 | 0.0255  | 0.322  | 0.1519  | 0.913   | 0.94   | 0.33 | 0.16  |
| <b>doxycycline</b>        | 0.8  | 0.81 | 1.01 | 0.66  | -0.63 | -0.60 | 1.05 | -0.0051 | -0.643 | -0.2943 | 0.445   | -0.57  | 0.83 | 0.38  |
| <b>drotaverine</b>        | 0.06 | 0.05 | 0.75 | 0.02  | 1.33  | 1.19  | 1.11 | 0.0073  | 1.474  | -0.7133 | -0.562  | -0.02  | 0.05 | -0.02 |
| <b>enalapril</b>          | 0.61 | 0.59 | 0.97 | 1.21  | -0.16 | -0.19 | 0.81 | -0.0032 | -0.181 | 0.1047  | 0.669   | -2.50  | 0.67 | -0.39 |
| <b>eplerenone</b>         | 0.33 | 0.33 | 0.98 | 0.34  | 0.32  | 0.31  | 1.03 | 0.0033  | 0.577  | 0.1380  | -0.321  | -0.33  | 0.59 | 0.14  |
| <b>escitalopram</b>       | 0.94 | 0.94 | 1.00 | 1.19  | -1.19 | -1.19 | 1.00 | -0.0151 | -2.390 | -0.6097 | 1.670   | -1.31  | 1.88 | 0.48  |
| <b>estradiol benzoate</b> | 0.42 | 0.42 | 1.00 | 1.16  | 0.14  | 0.14  | 1.00 | 0.0039  | 0.250  | 0.1611  | -4.227  | -12.67 | 0.75 | 0.48  |
| <b>estrone</b>            | 0.97 | 0.98 | 1.01 | 1.62  | -1.69 | -1.51 | 1.12 | -0.0280 | -1.779 | -0.4024 | 1.583   | -0.92  | 1.03 | 0.23  |
| <b>famotidine</b>         | 0.99 | 0.99 | 1.00 | 1.01  | -2.00 | -2.00 | 1.00 | -0.0204 | -2.101 | -0.6978 | 1.963   | -0.97  | 1.04 | 0.35  |
| <b>fexofenadine</b>       | 0.70 | 0.71 | 1.01 | 0.30  | -0.39 | -0.37 | 1.06 | -0.0016 | -2.222 | 0.3503  | 0.119   | -0.22  | 4.06 | -0.64 |
| <b>flouxetine</b>         | 0.61 | 0.60 | 0.98 | 0.73  | -0.17 | -0.19 | 0.86 | -0.0021 | -0.257 | -0.0438 | 0.223   | -0.79  | 0.92 | 0.16  |
| <b>flupenthixol</b>       | 0.68 | 0.67 | 0.99 | 3.15  | -0.31 | -0.33 | 0.94 | -0.0145 | -0.325 | -0.1594 | -1.487  | 3.24   | 0.71 | 0.35  |
| <b>furosemide</b>         | 0.51 | 0.52 | 1.02 | 1.00  | -0.03 | -0.02 | 2.00 | -0.0007 | -0.037 | -0.0065 | 0.122   | -1.82  | 0.55 | 0.10  |
| <b>gliclazide</b>         | 0.92 | 0.92 | 1.00 | 0.70  | -1.06 | -1.06 | 1.00 | -0.0081 | -1.117 | 4.4196  | 0.685   | -0.59  | 0.97 | -3.83 |
| <b>gliclazide</b>         | 0.95 | 0.95 | 1.00 | 1.09  | -1.28 | -1.28 | 1.00 | -0.0147 | -1.360 | -0.6730 | 1.516   | -1.13  | 1.01 | 0.50  |

|                               |      |      |      |      |       |       |      |         |        |         |        |        |      |       |
|-------------------------------|------|------|------|------|-------|-------|------|---------|--------|---------|--------|--------|------|-------|
| <b>haloperidol</b>            | 0.66 | 0.65 | 0.98 | 1.59 | -0.26 | -0.29 | 0.90 | -0.0064 | -0.282 | -0.1980 | 2.551  | -6.35  | 0.70 | 0.49  |
| <b>hydrocortisone acetate</b> | 0.96 | 0.96 | 1.00 | 1.59 | -1.38 | -1.38 | 1.00 | -0.0228 | -1.453 | -0.3286 | 3.286  | -2.29  | 1.01 | 0.23  |
| <b>hydroxyzine</b>            | 0.55 | 0.55 | 1.00 | 1.53 | -0.09 | -0.09 | 1.00 | -0.0024 | -0.094 | -0.0709 | 3.108  | -19.61 | 0.59 | 0.45  |
| <b>ibuprofen</b>              | 0.93 | 0.90 | 0.96 | 2.40 | -0.93 | -1.12 | 0.83 | -0.0249 | -0.980 | -0.2430 | 18.687 | -17.97 | 0.94 | 0.23  |
| <b>indomethacin</b>           | 0.88 | 0.90 | 1.02 | 1.42 | -0.95 | -0.87 | 1.10 | -0.0150 | -0.984 | 0.6673  | 2.028  | -1.91  | 0.93 | -0.63 |
| <b>ketoprofen</b>             | 0.89 | 0.89 | 1.00 | 1.64 | -0.91 | -0.91 | 1.00 | -0.0167 | -0.917 | -0.3547 | 2.812  | -2.76  | 0.90 | 0.35  |
| <b>ketotifen</b>              | 0.34 | 0.36 | 1.06 | 0.74 | 0.25  | 0.29  | 0.87 | 0.0051  | 0.333  | 0.9611  | -1.087 | -1.57  | 0.48 | 1.38  |
| <b>lamotrigine</b>            | 0.89 | 0.90 | 1.01 | 0.99 | -0.93 | -0.91 | 1.02 | -0.0103 | -1.692 | -0.6744 | 1.029  | -0.99  | 1.63 | 0.65  |
| <b>levocetizine</b>           | 0.63 | 0.64 | 1.02 | 1.21 | -0.25 | -0.23 | 1.08 | -0.0047 | -0.273 | -0.0718 | 0.830  | -2.13  | 0.70 | 0.18  |
| <b>levofloxacin</b>           | 0.17 | 0.17 | 0.97 | 0.23 | 0.70  | 0.69  | 1.02 | 0.0096  | 2.272  | 1.1358  | -1.125 | -0.26  | 0.53 | 0.27  |
| <b>loperamide</b>             | 0.68 | 0.67 | 0.99 | 1.53 | -0.31 | -0.33 | 0.94 | -0.0070 | -0.317 | -0.0614 | 2.004  | -4.37  | 0.69 | 0.13  |
| <b>loratadine</b>             | 0.94 | 0.94 | 1.00 | 2.22 | -1.19 | -1.19 | 1.00 | -0.0282 | -1.219 | -3.9833 | 9.061  | -7.13  | 0.96 | 3.13  |
| <b>lorazepam</b>              | 0.94 | 0.94 | 1.00 | 1.52 | -1.19 | -1.19 | 1.00 | -0.0194 | -1.374 | -0.3494 | 2.716  | -2.14  | 1.08 | 0.27  |
| <b>medazepam</b>              | 0.91 | 0.94 | 1.03 | 6.03 | -1.19 | -1.00 | 1.19 | -0.0766 | -1.207 | -0.2785 | -4.018 | 3.16   | 0.95 | 0.22  |
| <b>meloxicam</b>              | 0.99 | 0.98 | 0.99 | 0.72 | -1.69 | -2.00 | 0.85 | -0.0124 | -1.707 | 1.4571  | 1.035  | -0.60  | 0.99 | -0.84 |
| <b>methyldopa</b>             | 0.38 | 0.37 | 0.96 | 0.35 | 0.24  | 0.21  | 1.13 | 0.0023  | 1.202  | -0.1647 | -0.216 | -0.33  | 1.83 | -0.25 |
| <b>mianserin</b>              | 0.54 | 0.55 | 1.01 | 8.41 | -0.08 | -0.07 | 1.13 | -0.0121 | -0.087 | -0.0834 | -0.177 | 1.23   | 0.61 | 0.58  |
| <b>midazolam</b>              | 0.82 | 0.83 | 1.01 | 3.27 | -0.67 | -0.66 | 1.02 | -0.0267 | -0.694 | -0.1975 | -4.709 | 5.77   | 0.85 | 0.24  |
| <b>mirtazapine</b>            | 0.39 | 0.39 | 0.99 | 1.99 | 0.20  | 0.19  | 1.05 | 0.0105  | 0.239  | 0.1754  | 0.858  | 1.62   | 0.45 | 0.33  |
| <b>montelukast</b>            | 0.95 | 0.95 | 1.00 | 1.35 | -1.28 | -1.28 | 1.00 | -0.0182 | -1.292 | -0.3096 | 2.206  | -1.64  | 0.96 | 0.23  |
| <b>naproxen</b>               | 0.92 | 0.89 | 0.97 | 1.91 | -0.91 | -1.06 | 0.86 | -0.0195 | -0.917 | -0.3037 | 4.598  | -4.51  | 0.90 | 0.30  |
| <b>nebivolol</b>              | 0.75 | 0.75 | 1.00 | 1.06 | -0.48 | -0.48 | 1.00 | -0.0067 | -0.487 | 0.4632  | 0.811  | -1.28  | 0.77 | -0.73 |
| <b>olanzapine</b>             | 0.28 | 0.29 | 1.02 | 0.34 | 0.40  | 0.41  | 0.97 | 0.0048  | 2.283  | -0.2561 | -0.500 | -0.36  | 1.63 | -0.18 |
| <b>oxazepam</b>               | 0.93 | 0.94 | 1.01 | 1.52 | -1.16 | -1.12 | 1.03 | -0.0188 | -1.362 | -0.3979 | 2.631  | -2.12  | 1.10 | 0.32  |
| <b>oxybutinin</b>             | 0.68 | 0.66 | 0.97 | 1.33 | -0.29 | -0.33 | 0.88 | -0.0058 | -0.313 | -0.0889 | 1.155  | -2.65  | 0.72 | 0.20  |
| <b>pantoprazole</b>           | 0.93 | 0.92 | 0.99 | 1.07 | -1.06 | -1.12 | 0.94 | -0.0123 | -1.082 | 0.5612  | 1.271  | -1.10  | 0.94 | -0.49 |
| <b>paracetamol</b>            | 0.93 | 0.94 | 1.01 | 1.90 | -1.16 | -1.12 | 1.03 | -0.0235 | -4.632 | 0.8772  | 4.779  | -3.86  | 3.74 | -0.71 |
| <b>paroxetine</b>             | 0.55 | 0.56 | 1.02 | 1.41 | -0.10 | -0.09 | 1.20 | -0.0026 | -0.111 | 0.2137  | 1.183  | -6.33  | 0.60 | -1.14 |
| <b>pergolide</b>              | 0.48 | 0.47 | 0.98 | 1.06 | 0.05  | 0.03  | 1.50 | 0.0012  | 0.058  | 0.0228  | -0.322 | -2.90  | 0.52 | 0.21  |
| <b>perindopril</b>            | 0.47 | 0.46 | 0.97 | 0.47 | 0.08  | 0.05  | 1.50 | 0.0008  | 0.523  | 0.0381  | -0.079 | -0.46  | 3.03 | 0.22  |
| <b>phenytoin</b>              | 0.97 | 0.97 | 1.00 | 1.67 | -1.51 | -1.51 | 1.00 | -0.0259 | -1.677 | -2.0680 | 3.929  | -2.52  | 1.08 | 1.33  |
| <b>pindolol</b>               | 0.53 | 0.52 | 0.98 | 0.91 | -0.03 | -0.05 | 0.67 | -0.0006 | -0.087 | 0.0283  | 0.094  | -1.41  | 1.30 | -0.42 |
| <b>piroxicam</b>              | 0.98 | 0.98 | 1.00 | 0.91 | -1.69 | -1.69 | 1.00 | -0.0157 | -1.707 | -1.5796 | 1.432  | -0.83  | 0.99 | 0.92  |

|                       |      |      |      |      |       |       |      |         |        |         |        |        |      |        |
|-----------------------|------|------|------|------|-------|-------|------|---------|--------|---------|--------|--------|------|--------|
| <b>prednisolone</b>   | 0.94 | 0.94 | 0.99 | 0.99 | -1.16 | -1.19 | 0.97 | -0.0122 | -1.287 | -0.5761 | 1.193  | -0.96  | 1.04 | 0.47   |
| <b>progesterone</b>   | 0.96 | 0.96 | 1.00 | 2.06 | -1.38 | -1.38 | 1.00 | -0.0297 | -1.416 | -0.4424 | 6.989  | -4.86  | 0.98 | 0.31   |
| <b>promazine</b>      | 0.39 | 0.37 | 0.95 | 1.16 | 0.23  | 0.19  | 1.19 | 0.0073  | 0.246  | 0.0711  | 6.000  | 9.61   | 0.39 | 0.11   |
| <b>promethazine</b>   | 0.43 | 0.42 | 0.98 | 1.32 | 0.14  | 0.12  | 1.15 | 0.0044  | 0.151  | -0.7009 | 3.639  | 10.90  | 0.45 | -2.10  |
| <b>propafenone</b>    | 0.57 | 0.59 | 1.04 | 1.01 | -0.16 | -0.12 | 1.29 | -0.0027 | -0.163 | -0.0850 | 0.405  | -1.51  | 0.61 | 0.32   |
| <b>propranolol</b>    | 0.54 | 0.50 | 0.93 | 1.21 | 0.00  | -0.07 | 0.00 | 0.0000  | 0.000  | 0.0000  | 0.000  | -4.28  | 0.56 | 0.18   |
| <b>quetiapine</b>     | 0.68 | 0.68 | 1.00 | 0.92 | -0.33 | -0.33 | 1.00 | -0.0044 | -0.394 | -0.1153 | 0.519  | -1.08  | 0.82 | 0.24   |
| <b>quinapril</b>      | 0.44 | 0.44 | 1.00 | 0.46 | 0.10  | 0.10  | 1.00 | 0.0011  | 0.108  | 0.0620  | -0.106 | -0.45  | 0.45 | 0.26   |
| <b>risperidone</b>    | 0.29 | 0.29 | 0.98 | 0.46 | 0.40  | 0.39  | 1.03 | 0.0064  | 0.454  | 0.6341  | -0.900 | -0.64  | 0.32 | 0.45   |
| <b>rizatriptan</b>    | 0.20 | 0.20 | 0.98 | 0.33 | 0.62  | 0.60  | 1.02 | 0.0104  | 4.398  | -2.2806 | -1.544 | -0.49  | 1.39 | -0.72  |
| <b>rosuvastatin</b>   | 0.9  | 0.89 | 0.99 | 0.63 | -0.91 | -0.95 | 0.95 | -0.0064 | -1.032 | -0.7695 | 0.532  | -0.52  | 1.01 | 0.75   |
| <b>roxitromicin</b>   | 0.91 | 0.92 | 1.01 | 0.42 | -1.06 | -1.00 | 1.06 | -0.0049 | -1.105 | -0.3658 | 0.363  | -0.31  | 0.96 | 0.32   |
| <b>rupatadine</b>     | 0.42 | 0.43 | 1.02 | 1.48 | 0.12  | 0.14  | 0.87 | 0.0042  | 0.124  | 0.0751  | 1.480  | 5.20   | 0.44 | 0.26   |
| <b>sertraline</b>     | 0.53 | 0.53 | 1.00 | 4.41 | -0.05 | -0.05 | 1.00 | -0.0043 | -0.053 | -0.0311 | -0.147 | 1.49   | 0.54 | 0.32   |
| <b>sildenafil</b>     | 0.69 | 0.67 | 0.97 | 0.61 | -0.31 | -0.35 | 0.89 | -0.0028 | -0.320 | 0.2092  | 0.256  | -0.56  | 0.70 | -0.46  |
| <b>simvastatin</b>    | 0.19 | 0.17 | 0.89 | 0.23 | 0.69  | 0.63  | 1.09 | 0.0095  | 0.725  | 0.1554  | -1.114 | -0.27  | 0.18 | 0.04   |
| <b>spironolactone</b> | 0.98 | 0.96 | 0.97 | 1.11 | -1.33 | -1.69 | 0.78 | -0.0155 | -1.474 | -0.3984 | 1.609  | -1.16  | 1.06 | 0.29   |
| <b>sulpiride</b>      | 0.27 | 0.26 | 0.96 | 0.24 | 0.45  | 0.43  | 1.05 | 0.0041  | 1.136  | 0.9464  | -0.374 | -0.21  | 0.65 | 0.54   |
| <b>telmisartan</b>    | 0.90 | 0.90 | 0.99 | 1.42 | -0.93 | -0.95 | 0.98 | -0.0148 | -0.935 | -0.1259 | 2.013  | -1.94  | 0.90 | 0.12   |
| <b>temazepam</b>      | 0.94 | 0.94 | 0.99 | 1.77 | -1.16 | -1.19 | 0.97 | -0.0219 | -1.206 | -0.3676 | 3.867  | -3.12  | 0.97 | 0.30   |
| <b>theophylline</b>   | 0.86 | 0.87 | 1.01 | 1.25 | -0.81 | -0.79 | 1.02 | -0.0116 | -2.017 | 0.6158  | 1.436  | -1.54  | 2.16 | -0.66  |
| <b>thioridazine</b>   | 0.47 | 0.43 | 0.91 | 0.75 | 0.12  | 0.05  | 2.35 | 0.0021  | 0.129  | 0.0293  | -0.334 | -1.17  | 0.45 | 0.10   |
| <b>tolterodine</b>    | 0.1  | 0.08 | 0.80 | 0.34 | 1.06  | 0.95  | 1.11 | 0.0452  | 1.101  | 0.3274  | 6.186  | 0.47   | 0.08 | 0.02   |
| <b>trazodone</b>      | 0.71 | 0.72 | 1.01 | 1.69 | -0.40 | -0.39 | 1.03 | -0.0094 | -0.434 | -0.1427 | 3.044  | -5.45  | 0.78 | 0.26   |
| <b>tropicamid</b>     | 0.85 | 0.86 | 1.01 | 1.61 | -0.79 | -0.75 | 1.05 | -0.0148 | -1.752 | 78.8370 | 2.561  | -2.79  | 1.91 | -86.00 |
| <b>valproic acid</b>  | 0.69 | 0.67 | 0.97 | 1.80 | -0.31 | -0.35 | 0.89 | -0.0082 | -0.362 | -0.1178 | 6.176  | -13.45 | 0.79 | 0.26   |
| <b>valsartan</b>      | 0.89 | 0.91 | 1.02 | 0.81 | -0.98 | -0.91 | 1.08 | -0.0087 | -1.025 | -0.2523 | 0.786  | -0.73  | 0.95 | 0.23   |
| <b>venlafaxine</b>    | 0.36 | 0.37 | 1.03 | 1.13 | 0.23  | 0.25  | 0.93 | 0.0071  | 0.856  | 0.1605  | 9.712  | 15.55  | 1.37 | 0.26   |
| <b>verapamil</b>      | 0.54 | 0.53 | 0.97 | 0.82 | -0.04 | -0.07 | 0.62 | -0.0007 | -0.048 | -0.0763 | 0.091  | -1.10  | 0.58 | 0.92   |
| <b>zolmitriptane</b>  | 0.31 | 0.29 | 0.94 | 0.51 | 0.39  | 0.35  | 1.12 | 0.0068  | 1.555  | -0.3850 | -1.049 | -0.78  | 1.16 | -0.29  |
| <b>zolpidem</b>       | 0.86 | 0.88 | 1.02 | 2.34 | -0.87 | -0.79 | 1.10 | -0.0230 | -0.941 | -1.0062 | 15.802 | -16.07 | 0.96 | 1.02   |
| <b>zopiclone</b>      | 0.96 | 0.96 | 1.00 | 1.05 | -1.38 | -1.38 | 1.00 | -0.0150 | -3.067 | -0.5975 | 1.498  | -1.04  | 2.13 | 0.42   |
| <b>zuclopenthixol</b> | 0.47 | 0.47 | 1.00 | 0.90 | 0.05  | 0.05  | 1.00 | 0.0010  | 0.053  | 0.0105  | -0.183 | -1.65  | 0.48 | 0.09   |

\*  $R_f$  value from the non-impregnated NP plate (control)

\*\*  $R_f$  value from the NP plate impregnated with 2 mg/mL BSA solution

**Table S4.** Chromatographic data and their derivatives obtained from the RP TLC experiment for 129 APIs.

| API                  | C <sub>RP</sub> <sup>*</sup> | RP <sup>**</sup> | RP/C | RP/PSA | R <sub>M</sub> RP | R <sub>M</sub> RP | R <sub>M</sub> RP/C | R <sub>M</sub> RP/PSA | R <sub>M</sub> RP/PB | R <sub>M</sub> RP/logP | R <sub>M</sub> RP/B2 | RP/B2  | RP/PB | RP/logP |
|----------------------|------------------------------|------------------|------|--------|-------------------|-------------------|---------------------|-----------------------|----------------------|------------------------|----------------------|--------|-------|---------|
| acebutolol           | 0.78                         | 0.82             | 1.05 | 0.94   | -0.55             | -0.66             | 1.20                | -0.01                 | -2.533               | 1.996                  | 0.770                | -0.96  | 3.15  | -2.48   |
| aceclofenac          | 0.93                         | 0.93             | 1.00 | 1.23   | -1.12             | -1.12             | 1.00                | -0.01                 | -1.135               | -0.317                 | 1.694                | -1.40  | 0.94  | 0.26    |
| acenocumarol         | 0.93                         | 0.92             | 0.99 | 0.84   | -1.12             | -1.06             | 0.94                | -0.01                 | -1.075               | -0.396                 | 0.881                | -0.76  | 0.93  | 0.34    |
| acetylsalicylic acid | 0.98                         | 0.99             | 1.01 | 1.56   | -1.69             | -2.00             | 1.18                | -0.03                 | -2.006               | -1.535                 | 4.241                | -2.10  | 0.99  | 0.76    |
| aciclovir            | 0.99                         | 0.98             | 0.99 | 0.89   | -2.00             | -1.69             | 0.85                | -0.02                 | -8.049               | 1.166                  | 1.397                | -0.81  | 4.67  | -0.68   |
| alprazolam           | 0.80                         | 0.78             | 0.98 | 2.05   | -0.60             | -0.55             | 0.91                | -0.01                 | -0.687               | -0.117                 | 8.692                | -12.33 | 0.98  | 0.17    |
| amiodarone           | 0.33                         | 0.34             | 1.03 | 0.80   | 0.31              | 0.29              | 0.94                | 0.01                  | 0.300                | 0.096                  | -2.120               | -2.50  | 0.35  | 0.11    |
| amlodipine           | 0.61                         | 0.68             | 1.11 | 0.68   | -0.19             | -0.33             | 1.69                | 0.00                  | -0.336               | 0.217                  | 0.311                | -0.65  | 0.70  | -0.45   |
| amoxilcillin         | 0.99                         | 0.98             | 0.99 | 0.62   | -2.00             | -1.69             | 0.85                | -0.01                 | -8.451               | 11.268                 | 0.851                | -0.49  | 4.90  | -6.53   |
| astemizol            | 0.65                         | 0.62             | 0.95 | 1.66   | -0.27             | -0.21             | 0.79                | -0.01                 | -0.220               | -0.299                 | 4.149                | -12.10 | 0.64  | 0.87    |
| atorvastatin         | 0.80                         | 0.89             | 1.11 | 0.80   | -0.60             | -0.91             | 1.51                | -0.01                 | -0.927               | -0.590                 | 0.731                | -0.72  | 0.91  | 0.58    |
| atropine             | 0.73                         | 0.72             | 0.99 | 1.45   | -0.43             | -0.41             | 0.95                | -0.01                 | -2.279               | -0.240                 | 1.645                | -2.89  | 4.00  | 0.42    |
| azithromycin         | 0.24                         | 0.24             | 1.00 | 0.13   | 0.50              | 0.50              | 1.00                | 0.00                  | 1.726                | 0.205                  | -0.214               | -0.10  | 0.83  | 0.10    |
| betaxolol            | 0.27                         | 0.25             | 0.93 | 0.49   | 0.43              | 0.48              | 1.10                | 0.01                  | 0.954                | 0.477                  | -1.804               | -0.95  | 0.50  | 0.25    |
| bilastine            | 0.76                         | 0.72             | 0.95 | 0.92   | -0.50             | -0.41             | 0.82                | -0.01                 | -0.471               | -0.195                 | 0.579                | -1.02  | 0.83  | 0.34    |
| biperiden            | 0.87                         | 0.85             | 0.98 | 3.62   | -0.83             | -0.75             | 0.91                | -0.03                 | -1.256               | -0.278                 | -4.393               | 4.96   | 1.42  | 0.31    |
| bisoprolol           | 0.57                         | 0.56             | 0.98 | 0.93   | -0.12             | -0.10             | 0.86                | 0.00                  | -0.349               | -0.049                 | 0.254                | -1.36  | 1.87  | 0.26    |
| bromazepam           | 0.83                         | 0.81             | 0.98 | 1.49   | -0.69             | -0.63             | 0.91                | -0.01                 | -0.900               | -0.243                 | 1.952                | -2.51  | 1.16  | 0.31    |
| bromocriptine        | 0.69                         | 0.70             | 1.01 | 0.59   | -0.35             | -0.37             | 1.06                | 0.00                  | -0.396               | -0.082                 | 0.274                | -0.52  | 0.75  | 0.16    |
| buspirone            | 0.70                         | 0.69             | 0.99 | 0.99   | -0.37             | -0.35             | 0.94                | 0.00                  | -0.366               | -0.294                 | 0.613                | -1.22  | 0.73  | 0.58    |
| caffeine             | 0.91                         | 0.90             | 0.99 | 1.68   | -1.00             | -0.95             | 0.95                | -0.02                 | -3.181               | 0.900                  | 3.087                | -2.91  | 3.00  | -0.85   |
| capecitabine         | 0.90                         | 0.89             | 0.99 | 0.74   | -0.95             | -0.91             | 0.95                | -0.01                 | -1.513               | -1.713                 | 0.656                | -0.64  | 1.48  | 1.68    |
| captopril            | 0.99                         | 0.99             | 1.00 | 1.72   | -2.00             | -2.00             | 1.00                | -0.03                 | -7.257               | -6.652                 | 5.325                | -2.64  | 3.60  | 3.30    |
| carbamazepine        | 0.83                         | 0.84             | 1.01 | 1.81   | -0.69             | -0.72             | 1.05                | -0.02                 | -0.948               | -0.343                 | 3.707                | -4.32  | 1.11  | 0.40    |
| carbegoline          | 0.68                         | 0.68             | 1.00 | 0.95   | -0.33             | -0.33             | 1.00                | 0.00                  | -0.798               | -1.129                 | 0.546                | -1.13  | 1.66  | 2.34    |
| carvedilol           | 0.59                         | 0.61             | 1.03 | 0.81   | -0.16             | -0.19             | 1.23                | 0.00                  | -0.198               | 0.095                  | 0.292                | -0.92  | 0.62  | -0.30   |
| cefuroxime           | 0.88                         | 0.87             | 0.99 | 0.44   | -0.87             | -0.83             | 0.95                | 0.00                  | -1.651               | 0.397                  | 0.313                | -0.33  | 1.74  | -0.42   |
| celecoxib            | 0.75                         | 0.75             | 1.00 | 0.96   | -0.48             | -0.48             | 1.00                | -0.01                 | -0.492               | -0.468                 | 0.681                | -1.07  | 0.77  | 0.74    |
| celiprolol           | 0.75                         | 0.79             | 1.05 | 0.87   | -0.48             | -0.58             | 1.21                | -0.01                 | -2.092               | 1.279                  | 0.634                | -0.87  | 2.87  | -1.76   |
| cephalexin           | 0.99                         | 0.99             | 1.00 | 3.04   | -2.00             | -2.00             | 1.00                | -0.06                 | -14.255              | 1.523                  | -74.799              | 37.11  | 7.07  | -0.76   |



|                           |      |      |      |       |       |       |      |       |         |        |         |        |      |       |
|---------------------------|------|------|------|-------|-------|-------|------|-------|---------|--------|---------|--------|------|-------|
| <b>cetirizine</b>         | 0.83 | 0.82 | 0.99 | 1.55  | -0.69 | -0.66 | 0.96 | -0.01 | -0.708  | -0.312 | 2.187   | -2.72  | 0.88 | 0.39  |
| <b>chloramphenikol</b>    | 0.89 | 0.89 | 1.00 | 0.77  | -0.91 | -0.91 | 1.00 | -0.01 | -1.651  | 3.632  | 0.699   | -0.69  | 1.62 | -3.56 |
| <b>chlorthalidone</b>     | 0.49 | 0.50 | 1.02 | 1.57  | 0.02  | 0.00  | 0.00 | 0.00  | 0.000   | 0.000  | 0.000   | 12.98  | 0.56 | 0.13  |
| <b>cimetidine</b>         | 0.91 | 0.92 | 1.01 | 0.78  | -1.00 | -1.06 | 1.06 | -0.01 | -1.414  | 1.684  | 0.792   | -0.69  | 1.23 | -1.46 |
| <b>ciprofloxacin</b>      | 0.88 | 0.87 | 0.99 | 0.76  | -0.87 | -0.83 | 0.95 | -0.01 | -4.856  | 1.399  | 0.645   | -0.68  | 5.12 | -1.47 |
| <b>cisapride</b>          | 0.38 | 0.21 | 0.55 | 0.29  | 0.21  | 0.58  | 2.71 | 0.01  | 1.918   | -0.311 | -0.929  | -0.34  | 0.70 | -0.11 |
| <b>clarithromycin</b>     | 0.65 | 0.62 | 0.95 | 0.72  | -0.27 | -0.21 | 0.79 | 0.00  | -0.218  | -0.094 | 0.256   | -0.75  | 0.64 | 0.28  |
| <b>clindamycin</b>        | 0.83 | 0.78 | 0.94 | 0.43  | -0.69 | -0.55 | 0.80 | 0.00  | -0.785  | -0.174 | 0.231   | -0.33  | 1.11 | 0.25  |
| <b>clobazam</b>           | 0.25 | 0.25 | 1.00 | 0.24  | 0.48  | 0.48  | 1.00 | 0.00  | 0.513   | 0.300  | -0.417  | -0.22  | 0.27 | 0.16  |
| <b>clonidine</b>          | 0.79 | 0.80 | 1.01 | 1.99  | -0.58 | -0.60 | 1.05 | -0.01 | -0.708  | 0.430  | 6.197   | -8.23  | 0.94 | -0.57 |
| <b>clorazepate</b>        | 0.73 | 0.68 | 0.93 | 1.87  | -0.43 | -0.33 | 0.76 | -0.01 | -1.091  | -1.169 | 9.165   | -19.04 | 2.27 | 2.43  |
| <b>clozapine</b>          | 0.81 | 0.81 | 1.00 | 0.79  | -0.63 | -0.63 | 1.00 | -0.01 | -0.646  | -0.229 | 0.579   | -0.74  | 0.83 | 0.29  |
| <b>clozapine</b>          | 0.57 | 0.57 | 1.00 | 17.59 | -0.12 | -0.12 | 1.00 | -0.04 | -0.124  | -0.069 | -0.247  | 1.15   | 0.58 | 0.32  |
| <b>cypheptadine</b>       | 0.45 | 0.47 | 1.04 | 1.70  | 0.09  | 0.05  | 0.60 | 0.00  | 0.054   | 0.045  | 0.497   | 4.48   | 0.48 | 0.41  |
| <b>desloratidine</b>      | 0.58 | 0.58 | 1.00 | 2.33  | -0.14 | -0.14 | 1.00 | -0.01 | -0.166  | -2.003 | -0.945  | 3.91   | 0.69 | 8.29  |
| <b>diazepam</b>           | 0.77 | 0.77 | 1.00 | 2.36  | -0.52 | -0.52 | 1.00 | -0.02 | -0.535  | -0.174 | -21.613 | 31.71  | 0.79 | 0.26  |
| <b>digoxin</b>            | 0.84 | 0.85 | 1.01 | 0.42  | -0.72 | -0.75 | 1.05 | 0.00  | -3.013  | -0.282 | 0.279   | -0.31  | 3.40 | 0.32  |
| <b>dihydroergotamine</b>  | 0.78 | 0.78 | 1.00 | 0.66  | -0.55 | -0.55 | 1.00 | 0.00  | -0.591  | 0.261  | 0.409   | -0.58  | 0.84 | -0.37 |
| <b>diphenhydramin</b>     | 0.58 | 0.54 | 0.93 | 4.33  | -0.14 | -0.07 | 0.50 | -0.01 | -0.071  | -0.033 | -0.200  | 1.55   | 0.55 | 0.26  |
| <b>doxazosin</b>          | 0.75 | 0.73 | 0.97 | 0.59  | -0.48 | -0.43 | 0.91 | 0.00  | -0.441  | -0.202 | 0.305   | -0.52  | 0.74 | 0.34  |
| <b>doxycycline</b>        | 0.08 | 0.09 | 1.13 | 0.05  | 1.06  | 1.00  | 0.95 | 0.01  | 1.116   | -0.540 | -0.426  | -0.04  | 0.10 | -0.05 |
| <b>drotaverine</b>        | 0.55 | 0.58 | 1.05 | 1.18  | -0.09 | -0.14 | 1.61 | 0.00  | -0.160  | 0.093  | 0.593   | -2.46  | 0.66 | -0.38 |
| <b>enalapril</b>          | 0.60 | 0.58 | 0.97 | 0.60  | -0.18 | -0.14 | 0.80 | 0.00  | -0.255  | -0.061 | 0.142   | -0.59  | 1.05 | 0.25  |
| <b>eplerenone</b>         | 0.84 | 0.85 | 1.01 | 1.08  | -0.72 | -0.75 | 1.05 | -0.01 | -1.507  | -0.384 | 1.053   | -1.19  | 1.70 | 0.43  |
| <b>escitalopram</b>       | 0.55 | 0.52 | 0.95 | 1.43  | -0.09 | -0.03 | 0.40 | 0.00  | -0.062  | -0.040 | 1.048   | -15.68 | 0.93 | 0.60  |
| <b>estradiol benzoate</b> | 0.63 | 0.62 | 0.98 | 1.03  | -0.23 | -0.21 | 0.92 | 0.00  | -0.224  | -0.051 | 0.199   | -0.58  | 0.65 | 0.15  |
| <b>estrone</b>            | 0.79 | 0.77 | 0.97 | 0.79  | -0.58 | -0.52 | 0.91 | -0.01 | -0.552  | -0.183 | 0.516   | -0.76  | 0.81 | 0.27  |
| <b>famotidine</b>         | 0.98 | 0.99 | 1.01 | 0.42  | -1.69 | -2.00 | 1.18 | -0.01 | -11.404 | 1.798  | 0.613   | -0.30  | 5.66 | -0.89 |
| <b>fexofenadine</b>       | 0.85 | 0.86 | 1.01 | 1.06  | -0.75 | -0.79 | 1.05 | -0.01 | -1.213  | -0.207 | 1.053   | -1.15  | 1.32 | 0.23  |
| <b>fluoxetine</b>         | 0.54 | 0.73 | 1.35 | 3.43  | -0.07 | -0.43 | 6.20 | -0.02 | -0.457  | -0.224 | -2.088  | 3.53   | 0.77 | 0.38  |
| <b>flupenthixol</b>       | 0.66 | 0.66 | 1.00 | 1.27  | -0.29 | -0.29 | 1.00 | -0.01 | -0.303  | -0.054 | 1.010   | -2.31  | 0.69 | 0.12  |
| <b>furosemide</b>         | 0.96 | 0.96 | 1.00 | 0.73  | -1.38 | -1.38 | 1.00 | -0.01 | -1.453  | 5.751  | 0.891   | -0.62  | 1.01 | -4.00 |
| <b>gliclazide</b>         | 0.83 | 0.80 | 0.96 | 0.92  | -0.69 | -0.60 | 0.87 | -0.01 | -0.640  | -0.317 | 0.714   | -0.95  | 0.85 | 0.42  |

|                               |      |      |      |      |       |       |      |       |        |        |        |        |      |       |
|-------------------------------|------|------|------|------|-------|-------|------|-------|--------|--------|--------|--------|------|-------|
| <b>haloperidol</b>            | 0.61 | 0.64 | 1.05 | 1.58 | -0.19 | -0.25 | 1.29 | -0.01 | -0.272 | -0.191 | 2.458  | -6.30  | 0.70 | 0.49  |
| <b>hydrocortisone acetate</b> | 0.82 | 0.82 | 1.00 | 1.36 | -0.66 | -0.66 | 1.00 | -0.01 | -0.693 | -0.157 | 1.568  | -1.95  | 0.86 | 0.20  |
| <b>hydroxyzine</b>            | 0.62 | 0.59 | 0.95 | 1.64 | -0.21 | -0.16 | 0.74 | 0.00  | -0.170 | -0.129 | 5.637  | -21.04 | 0.63 | 0.48  |
| <b>ibuprofen</b>              | 0.83 | 0.81 | 0.98 | 2.17 | -0.69 | -0.63 | 0.91 | -0.02 | -0.663 | -0.164 | 12.645 | -16.27 | 0.85 | 0.21  |
| <b>indomethacin</b>           | 0.88 | 0.87 | 0.99 | 1.37 | -0.87 | -0.83 | 0.95 | -0.01 | -0.851 | 0.577  | 1.754  | -1.85  | 0.90 | -0.61 |
| <b>ketoprofen</b>             | 0.91 | 0.86 | 0.95 | 1.58 | -1.00 | -0.79 | 0.78 | -0.01 | -0.796 | -0.308 | 2.441  | -2.66  | 0.87 | 0.34  |
| <b>ketotifen</b>              | 0.75 | 0.74 | 0.99 | 1.52 | -0.48 | -0.45 | 0.95 | -0.01 | -0.606 | -1.747 | 1.977  | -3.22  | 0.99 | 2.85  |
| <b>lamotrigine</b>            | 0.87 | 0.86 | 0.99 | 0.95 | -0.83 | -0.79 | 0.95 | -0.01 | -1.433 | -0.571 | 0.872  | -0.95  | 1.56 | 0.62  |
| <b>levocetizine</b>           | 0.83 | 0.83 | 1.00 | 1.57 | -0.69 | -0.69 | 1.00 | -0.01 | -0.753 | -0.198 | 2.287  | -2.76  | 0.91 | 0.24  |
| <b>levofloxacin</b>           | 0.27 | 0.30 | 1.11 | 0.41 | 0.43  | 0.37  | 0.85 | 0.01  | 1.187  | 0.594  | -0.588 | -0.48  | 0.97 | 0.48  |
| <b>loperamide</b>             | 0.75 | 0.77 | 1.03 | 1.76 | -0.48 | -0.52 | 1.10 | -0.01 | -0.541 | -0.105 | 3.419  | -5.02  | 0.79 | 0.15  |
| <b>loratadine</b>             | 0.68 | 0.68 | 1.00 | 1.60 | -0.33 | -0.33 | 1.00 | -0.01 | -0.334 | -1.091 | 2.482  | -5.16  | 0.69 | 2.27  |
| <b>lorazepam</b>              | 0.83 | 0.83 | 1.00 | 1.35 | -0.69 | -0.69 | 1.00 | -0.01 | -0.792 | -0.201 | 1.565  | -1.89  | 0.95 | 0.24  |
| <b>medazepam</b>              | 0.66 | 0.65 | 0.98 | 4.17 | -0.29 | -0.27 | 0.93 | -0.02 | -0.272 | -0.063 | -0.904 | 2.19   | 0.66 | 0.15  |
| <b>meloxicam</b>              | 0.95 | 0.95 | 1.00 | 0.70 | -1.28 | -1.28 | 1.00 | -0.01 | -1.292 | 1.102  | 0.783  | -0.58  | 0.96 | -0.82 |
| <b>methyldopa</b>             | 0.85 | 0.86 | 1.01 | 0.83 | -0.75 | -0.79 | 1.05 | -0.01 | -3.942 | 0.540  | 0.708  | -0.77  | 4.30 | -0.59 |
| <b>mianserin</b>              | 0.55 | 0.55 | 1.00 | 8.49 | -0.09 | -0.09 | 1.00 | -0.01 | -0.097 | -0.093 | -0.197 | 1.24   | 0.61 | 0.59  |
| <b>midazolam</b>              | 0.66 | 0.66 | 1.00 | 2.61 | -0.29 | -0.29 | 1.00 | -0.01 | -0.297 | -0.084 | -2.014 | 4.62   | 0.68 | 0.19  |
| <b>mirtazapine</b>            | 0.58 | 0.58 | 1.00 | 2.99 | -0.14 | -0.14 | 1.00 | -0.01 | -0.165 | -0.121 | -0.591 | 2.45   | 0.68 | 0.50  |
| <b>montelukast</b>            | 0.70 | 0.69 | 0.99 | 0.98 | -0.37 | -0.35 | 0.94 | 0.00  | -0.351 | -0.084 | 0.599  | -1.19  | 0.70 | 0.17  |
| <b>naproxen</b>               | 0.88 | 0.87 | 0.99 | 1.87 | -0.87 | -0.83 | 0.95 | -0.02 | -0.834 | -0.276 | 4.181  | -4.41  | 0.88 | 0.29  |
| <b>nebivolol</b>              | 0.40 | 0.40 | 1.00 | 0.56 | 0.18  | 0.18  | 1.00 | 0.00  | 0.180  | -0.171 | -0.299 | -0.68  | 0.41 | -0.39 |
| <b>olanzapine</b>             | 0.53 | 0.50 | 0.94 | 0.59 | -0.05 | 0.00  | 0.00 | 0.00  | 0.000  | 0.000  | 0.000  | -0.63  | 2.86 | -0.32 |
| <b>oxazepam</b>               | 0.83 | 0.84 | 1.01 | 1.36 | -0.69 | -0.72 | 1.05 | -0.01 | -0.847 | -0.247 | 1.637  | -1.91  | 0.99 | 0.29  |
| <b>oxybutinin</b>             | 0.29 | 0.24 | 0.83 | 0.48 | 0.39  | 0.50  | 1.29 | 0.01  | 0.544  | 0.155  | -2.008 | -0.96  | 0.26 | 0.07  |
| <b>pantoprazole</b>           | 0.85 | 0.83 | 0.98 | 0.96 | -0.75 | -0.69 | 0.91 | -0.01 | -0.703 | 0.364  | 0.825  | -0.99  | 0.85 | -0.44 |
| <b>paracetamol</b>            | 0.92 | 0.92 | 1.00 | 1.86 | -1.06 | -1.06 | 1.00 | -0.02 | -4.243 | 0.804  | 4.378  | -3.80  | 3.68 | -0.70 |
| <b>paroxetine</b>             | 0.60 | 0.67 | 1.12 | 1.69 | -0.18 | -0.31 | 1.75 | -0.01 | -0.327 | 0.628  | 3.474  | -7.57  | 0.71 | -1.37 |
| <b>pergolide</b>              | 0.55 | 0.53 | 0.96 | 1.20 | -0.09 | -0.05 | 0.60 | 0.00  | -0.058 | -0.023 | 0.322  | -3.27  | 0.59 | 0.23  |
| <b>perindopril</b>            | 0.57 | 0.58 | 1.02 | 0.60 | -0.12 | -0.14 | 1.15 | 0.00  | -0.935 | -0.068 | 0.142  | -0.59  | 3.87 | 0.28  |
| <b>phenytoin</b>              | 0.87 | 0.86 | 0.99 | 1.48 | -0.83 | -0.79 | 0.95 | -0.01 | -0.876 | -1.080 | 2.052  | -2.24  | 0.96 | 1.18  |
| <b>pindolol</b>               | 0.76 | 0.78 | 1.03 | 1.36 | -0.50 | -0.55 | 1.10 | -0.01 | -1.374 | 0.447  | 1.488  | -2.11  | 1.95 | -0.63 |
| <b>piroxicam</b>              | 0.58 | 0.60 | 1.03 | 0.56 | -0.14 | -0.18 | 1.26 | 0.00  | -0.178 | -0.165 | 0.149  | -0.51  | 0.61 | 0.56  |

|                       |      |      |      |      |       |       |      |       |        |        |         |        |      |        |
|-----------------------|------|------|------|------|-------|-------|------|-------|--------|--------|---------|--------|------|--------|
| <b>prednisolone</b>   | 0.87 | 0.88 | 1.01 | 0.93 | -0.83 | -0.87 | 1.05 | -0.01 | -0.961 | -0.430 | 0.892   | -0.91  | 0.98 | 0.44   |
| <b>progesterone</b>   | 0.71 | 0.68 | 0.96 | 1.46 | -0.39 | -0.33 | 0.84 | -0.01 | -0.336 | -0.105 | 1.658   | -3.44  | 0.70 | 0.22   |
| <b>promazine</b>      | 0.51 | 0.51 | 1.00 | 1.60 | -0.02 | -0.02 | 1.00 | 0.00  | -0.018 | -0.005 | -0.451  | 13.24  | 0.54 | 0.16   |
| <b>promethazine</b>   | 0.49 | 0.47 | 0.96 | 1.48 | 0.02  | 0.05  | 3.00 | 0.00  | 0.056  | -0.261 | 1.355   | 12.20  | 0.51 | -2.35  |
| <b>propafenone</b>    | 0.56 | 0.61 | 1.09 | 1.04 | -0.10 | -0.19 | 1.85 | 0.00  | -0.200 | -0.104 | 0.498   | -1.56  | 0.63 | 0.33   |
| <b>propranolol</b>    | 0.64 | 0.63 | 0.98 | 1.52 | -0.25 | -0.23 | 0.93 | -0.01 | -0.257 | -0.083 | 1.978   | -5.39  | 0.70 | 0.23   |
| <b>quetiapine</b>     | 0.73 | 0.69 | 0.95 | 0.94 | -0.43 | -0.35 | 0.80 | 0.00  | -0.419 | -0.122 | 0.551   | -1.09  | 0.83 | 0.24   |
| <b>quinapril</b>      | 0.57 | 0.56 | 0.98 | 0.58 | -0.12 | -0.10 | 0.86 | 0.00  | -0.108 | -0.062 | 0.106   | -0.57  | 0.58 | 0.33   |
| <b>risperidone</b>    | 0.62 | 0.58 | 0.94 | 0.94 | -0.21 | -0.14 | 0.66 | 0.00  | -0.159 | -0.223 | 0.316   | -1.31  | 0.66 | 0.92   |
| <b>rizatriptan</b>    | 0.72 | 0.77 | 1.07 | 1.30 | -0.41 | -0.52 | 1.28 | -0.01 | -3.748 | 1.944  | 1.316   | -1.93  | 5.50 | -2.85  |
| <b>rosuvastatin</b>   | 0.92 | 0.88 | 0.96 | 0.62 | -1.06 | -0.87 | 0.82 | -0.01 | -0.983 | -0.733 | 0.507   | -0.52  | 1.00 | 0.75   |
| <b>roxitromicin</b>   | 0.80 | 0.79 | 0.99 | 0.36 | -0.60 | -0.58 | 0.96 | 0.00  | -0.599 | -0.198 | 0.197   | -0.27  | 0.82 | 0.27   |
| <b>rupatadine</b>     | 0.55 | 0.52 | 0.95 | 1.79 | -0.09 | -0.03 | 0.40 | 0.00  | -0.035 | -0.021 | -0.420  | 6.29   | 0.53 | 0.32   |
| <b>sertraline</b>     | 0.49 | 0.48 | 0.98 | 3.99 | 0.02  | 0.03  | 2.00 | 0.00  | 0.035  | 0.021  | 0.098   | 1.35   | 0.49 | 0.29   |
| <b>sildenafil</b>     | 0.77 | 0.76 | 0.99 | 0.70 | -0.52 | -0.50 | 0.95 | 0.00  | -0.521 | 0.341  | 0.417   | -0.63  | 0.79 | -0.52  |
| <b>simvastatin</b>    | 0.66 | 0.65 | 0.98 | 0.89 | -0.29 | -0.27 | 0.93 | 0.00  | -0.283 | -0.061 | 0.435   | -1.05  | 0.68 | 0.15   |
| <b>spironolactone</b> | 0.78 | 0.77 | 0.99 | 0.90 | -0.55 | -0.52 | 0.95 | -0.01 | -0.583 | -0.158 | 0.636   | -0.93  | 0.86 | 0.23   |
| <b>sulpiride</b>      | 0.85 | 0.86 | 1.01 | 0.78 | -0.75 | -0.79 | 1.05 | -0.01 | -1.971 | -1.642 | 0.649   | -0.71  | 2.15 | 1.79   |
| <b>telmisartan</b>    | 0.87 | 0.85 | 0.98 | 1.35 | -0.83 | -0.75 | 0.91 | -0.01 | -0.757 | -0.102 | 1.630   | -1.84  | 0.85 | 0.12   |
| <b>temazepam</b>      | 0.79 | 0.79 | 1.00 | 1.49 | -0.58 | -0.58 | 1.00 | -0.01 | -0.599 | -0.183 | 1.922   | -2.64  | 0.82 | 0.25   |
| <b>theophylline</b>   | 0.94 | 0.93 | 0.99 | 1.34 | -1.19 | -1.12 | 0.94 | -0.02 | -2.808 | 0.858  | 2.000   | -1.66  | 2.33 | -0.71  |
| <b>thioridazine</b>   | 0.40 | 0.40 | 1.00 | 0.70 | 0.18  | 0.18  | 1.00 | 0.00  | 0.185  | 0.042  | -0.481  | -1.09  | 0.42 | 0.10   |
| <b>tolterodine</b>    | 0.45 | 0.43 | 0.96 | 1.83 | 0.09  | 0.12  | 1.40 | 0.01  | 0.127  | 0.038  | 0.714   | 2.51   | 0.45 | 0.13   |
| <b>trazodone</b>      | 0.76 | 0.74 | 0.97 | 1.75 | -0.50 | -0.45 | 0.91 | -0.01 | -0.494 | -0.162 | 3.461   | -5.64  | 0.80 | 0.26   |
| <b>tropicamid</b>     | 0.83 | 0.83 | 1.00 | 1.55 | -0.69 | -0.69 | 1.00 | -0.01 | -1.530 | 68.863 | 2.237   | -2.70  | 1.84 | -83.00 |
| <b>valproic acid</b>  | 0.04 | 0.04 | 1.00 | 0.11 | 1.38  | 1.38  | 1.00 | 0.04  | 1.624  | 0.529  | -27.715 | -0.80  | 0.05 | 0.02   |
| <b>valsartan</b>      | 0.97 | 0.96 | 0.99 | 0.86 | -1.51 | -1.38 | 0.91 | -0.01 | -1.445 | -0.356 | 1.108   | -0.77  | 1.01 | 0.25   |
| <b>venlafaxine</b>    | 0.61 | 0.65 | 1.07 | 1.99 | -0.19 | -0.27 | 1.38 | -0.01 | -0.996 | -0.187 | -11.296 | 27.31  | 2.41 | 0.45   |
| <b>verapamil</b>      | 0.86 | 0.86 | 1.00 | 1.34 | -0.79 | -0.79 | 1.00 | -0.01 | -0.876 | -1.383 | 1.656   | -1.81  | 0.96 | 1.51   |
| <b>zolmitriptane</b>  | 0.86 | 0.86 | 1.00 | 1.50 | -0.79 | -0.79 | 1.00 | -0.01 | -3.153 | 0.781  | 2.126   | -2.32  | 3.44 | -0.85  |
| <b>zolpidem</b>       | 0.76 | 0.77 | 1.01 | 2.05 | -0.50 | -0.52 | 1.05 | -0.01 | -0.570 | -0.610 | 9.583   | -14.06 | 0.84 | 0.90   |
| <b>zopiclone</b>      | 0.84 | 0.83 | 0.99 | 0.90 | -0.72 | -0.69 | 0.96 | -0.01 | -1.530 | -0.298 | 0.748   | -0.90  | 1.84 | 0.36   |
| <b>zuclopenthixol</b> | 0.62 | 0.60 | 0.97 | 1.15 | -0.21 | -0.18 | 0.83 | 0.00  | -0.179 | -0.035 | 0.618   | -2.10  | 0.61 | 0.12   |

\*  $R_f$  value from the non-impregnated RP plate (control)

\*\*  $R_f$  value from the RP plate impregnated with 2 mg/mL BSA solution

**Table S5.** Chromatographic data obtained for 129 compounds from HPLC<sub>HSA</sub> and HPLC<sub>IAM</sub> experiments and their derivatives.

| API                  | k <sub>HSA</sub> | log k <sub>HSA</sub> | log k <sub>HSA</sub><br>/B2 | log k <sub>HSA</sub><br>/log P | log k <sub>HSA</sub><br>/PB | log k <sub>HSA</sub><br>/PSA | k <sub>IAM</sub> | log k <sub>IAM</sub> | log k <sub>IAM</sub><br>/B2 | log k <sub>IAM</sub><br>/log P | log k <sub>IAM</sub><br>/PB | log k <sub>IAM</sub><br>/PSA |
|----------------------|------------------|----------------------|-----------------------------|--------------------------------|-----------------------------|------------------------------|------------------|----------------------|-----------------------------|--------------------------------|-----------------------------|------------------------------|
| acebutolol           | 1.13             | 0.05                 | -0.06                       | -0.16                          | 0.20                        | 0.001                        | 5.06             | 0.70                 | -0.82                       | -2.13                          | 2.71                        | 0.01                         |
| aceclofenac          | 55.89            | 1.75                 | -2.64                       | 0.49                           | 1.76                        | 0.023                        | 2.63             | 0.42                 | -0.63                       | 0.12                           | 0.42                        | 0.01                         |
| acenocumarol         | 18.58            | 1.27                 | -1.05                       | 0.47                           | 1.29                        | 0.012                        | 0.53             | -0.27                | 0.23                        | -0.10                          | -0.28                       | 0.00                         |
| acetylsalicylic acid | 0.31             | -0.51                | 1.08                        | -0.39                          | -0.51                       | -0.008                       | 0.03             | -1.52                | 3.22                        | -1.17                          | -1.52                       | -0.02                        |
| aciclovir            | 0.19             | -0.72                | 0.60                        | 0.50                           | -3.43                       | -0.007                       | 0.09             | -1.04                | 0.86                        | 0.72                           | -4.94                       | -0.01                        |
| alprazolam           | 0.89             | -0.05                | 0.80                        | -0.01                          | -0.06                       | -0.001                       | 3.14             | 0.50                 | -7.85                       | 0.11                           | 0.62                        | 0.01                         |
| amiodarone           | 124.01           | 2.09                 | -15.41                      | 0.70                           | 2.18                        | 0.049                        | 99.63            | 2.00                 | -14.71                      | 0.66                           | 2.08                        | 0.05                         |
| amlodipine           | 5.45             | 0.74                 | -0.70                       | -0.49                          | 0.75                        | 0.007                        | 98.90            | 2.00                 | -1.90                       | -1.32                          | 2.05                        | 0.02                         |
| amoxicillin          | 0.94             | -0.03                | 0.01                        | 0.18                           | -0.13                       | 0.000                        | 0.05             | -1.32                | 0.66                        | 8.80                           | -6.60                       | -0.01                        |
| astemizol            | 13.32            | 1.12                 | -21.95                      | 1.58                           | 1.16                        | 0.030                        | 26.27            | 1.42                 | -27.70                      | 2.00                           | 1.47                        | 0.04                         |
| atorvastatin         | 3.48             | 0.54                 | -0.44                       | 0.35                           | 0.55                        | 0.005                        | 8.28             | 0.92                 | -0.74                       | 0.60                           | 0.94                        | 0.01                         |
| atropine             | 1.23             | 0.09                 | -0.36                       | 0.05                           | 0.50                        | 0.002                        | 3.91             | 0.59                 | -2.38                       | 0.35                           | 3.29                        | 0.01                         |
| azithromycin         | 0.23             | -0.64                | 0.27                        | -0.26                          | -2.20                       | -0.004                       | 0.06             | -1.20                | 0.51                        | -0.49                          | -4.14                       | -0.01                        |
| betaxolol            | 1.59             | 0.20                 | -0.76                       | 0.20                           | 0.40                        | 0.004                        | 15.60            | 1.19                 | -4.51                       | 1.19                           | 2.39                        | 0.02                         |
| bilastine            | 0.67             | -0.17                | 0.25                        | -0.08                          | -0.20                       | -0.002                       | 0.55             | -0.26                | 0.36                        | -0.12                          | -0.30                       | 0.00                         |
| biperiden            | 0.58             | -0.24                | -1.38                       | -0.09                          | -0.39                       | -0.010                       | 41.47            | 1.62                 | 9.43                        | 0.60                           | 2.70                        | 0.07                         |
| bisoprolol           | 1.07             | 0.03                 | -0.07                       | 0.01                           | 0.10                        | 0.000                        | 6.74             | 0.83                 | -2.01                       | 0.39                           | 2.76                        | 0.01                         |
| bromazepam           | 0.63             | -0.20                | 0.62                        | -0.08                          | -0.29                       | -0.004                       | 2.21             | 0.34                 | -1.07                       | 0.13                           | 0.49                        | 0.01                         |
| bromocriptine        | 8.09             | 0.91                 | -0.68                       | 0.20                           | 0.98                        | 0.008                        | 12.69            | 1.10                 | -0.82                       | 0.25                           | 1.19                        | 0.01                         |
| buspirone            | 0.89             | -0.05                | 0.09                        | -0.04                          | -0.05                       | -0.001                       | 7.00             | 0.84                 | -1.49                       | 0.72                           | 0.89                        | 0.01                         |
| caffeine             | 0.23             | -0.64                | 2.06                        | 0.60                           | -2.13                       | -0.012                       | 0.18             | -0.75                | 2.44                        | 0.71                           | -2.51                       | -0.01                        |
| capecitabine         | 0.3              | -0.52                | 0.38                        | -0.99                          | -0.87                       | -0.004                       | 1.11             | 0.04                 | -0.03                       | 0.08                           | 0.07                        | 0.00                         |
| captopril            | 0.15             | -0.82                | 2.20                        | -2.75                          | -3.00                       | -0.014                       | 0.01             | -2.19                | 5.83                        | -7.28                          | -7.95                       | -0.04                        |
| carbamazepine        | 1.09             | 0.04                 | -0.19                       | 0.02                           | 0.05                        | 0.001                        | 1.50             | 0.18                 | -0.91                       | 0.08                           | 0.23                        | 0.00                         |
| carbegoline          | 3.23             | 0.51                 | -0.85                       | 1.76                           | 1.24                        | 0.007                        | 17.05            | 1.23                 | -2.05                       | 4.25                           | 3.00                        | 0.02                         |
| carvedilol           | 14.5             | 1.16                 | -1.75                       | -0.57                          | 1.19                        | 0.015                        | 0.00             |                      |                             |                                |                             |                              |
| cefuroxime           | 0.23             | -0.64                | 0.24                        | 0.31                           | -1.28                       | -0.003                       | 1.69             | 0.23                 | -0.09                       | -0.11                          | 0.45                        | 0.00                         |

|                           |       |       |        |       |       |        |       |       |        |       |       |       |
|---------------------------|-------|-------|--------|-------|-------|--------|-------|-------|--------|-------|-------|-------|
| <b>celecoxib</b>          | 13.42 | 1.13  | -1.61  | 1.11  | 1.16  | 0.014  | 50.01 | 1.70  | -2.42  | 1.67  | 1.75  | 0.02  |
| <b>celiprolol</b>         | 1.12  | 0.05  | -0.05  | -0.11 | 0.18  | 0.001  | 5.87  | 0.77  | -0.85  | -1.71 | 2.80  | 0.01  |
| <b>cephalexin</b>         | 0.16  | -0.80 | -29.83 | 0.61  | -5.68 | -0.024 | 0.00  |       |        |       |       |       |
| <b>cetirizine</b>         | 1.55  | 0.19  | -0.63  | 0.09  | 0.20  | 0.004  | 1.05  | 0.02  | -0.07  | 0.01  | 0.02  | 0.00  |
| <b>chloramphenikol</b>    | 0.61  | -0.21 | 0.17   | 0.86  | -0.39 | -0.002 | 1.08  | 0.03  | -0.03  | -0.13 | 0.06  | 0.00  |
| <b>chlorpromazine</b>     | 13.33 | 1.12  | 29.20  | 0.30  | 1.25  | 0.035  | 58.85 | 1.77  | 45.94  | 0.47  | 1.97  | 0.06  |
| <b>chlortalidone</b>      | 0.85  | -0.07 | 0.05   | 0.11  | -0.09 | -0.001 | 1.32  | 0.12  | -0.09  | -0.19 | 0.16  | 0.00  |
| <b>cimetidine</b>         | 0.67  | -0.17 | 0.14   | 0.29  | -1.02 | -0.002 | 0.26  | -0.58 | 0.45   | 0.98  | -3.41 | -0.01 |
| <b>ciprofloxacin</b>      | 0.19  | -0.72 | 1.17   | 0.39  | -2.40 | -0.010 | 1.22  | 0.09  | -0.14  | -0.05 | 0.29  | 0.00  |
| <b>cisapride</b>          | 4.88  | 0.69  | -0.83  | 0.31  | 0.71  | 0.008  | 57.99 | 1.76  | -2.13  | 0.78  | 1.81  | 0.02  |
| <b>clarithromycin</b>     | 0.82  | -0.09 | 0.04   | -0.03 | -0.12 | 0.000  | 0.10  | -1.02 | 0.43   | -0.32 | -1.45 | -0.01 |
| <b>clindamycin</b>        | 1.34  | 0.13  | -0.11  | 0.08  | 0.14  | 0.001  | 11.34 | 1.05  | -0.92  | 0.66  | 1.13  | 0.01  |
| <b>clobazam</b>           | 1.01  | 0.00  | -0.04  | 0.00  | 0.01  | 0.000  | 2.58  | 0.41  | -4.23  | -0.29 | 0.48  | 0.01  |
| <b>clonidine</b>          | 1.35  | 0.13  | -3.65  | 0.47  | 0.43  | 0.004  | 2.83  | 0.45  | -12.66 | 1.61  | 1.51  | 0.01  |
| <b>clorazepate</b>        | 3.99  | 0.60  | -0.55  | 0.22  | 0.62  | 0.006  | 4.88  | 0.69  | -0.63  | 0.25  | 0.71  | 0.01  |
| <b>clozapine</b>          | 6.84  | 0.84  | 1.69   | 0.47  | 0.84  | 0.258  | 50.94 | 1.71  | 3.45   | 0.96  | 1.72  | 0.53  |
| <b>cypheptadine</b>       | 9.7   | 0.99  | 9.40   | 0.85  | 1.01  | 0.036  | 23.79 | 1.38  | 13.12  | 1.19  | 1.41  | 0.05  |
| <b>desloratidine</b>      | 5.97  | 0.78  | 5.23   | 11.09 | 0.92  | 0.031  | 50.45 | 1.70  | 11.48  | 24.33 | 2.02  | 0.07  |
| <b>diazepam</b>           | 3.57  | 0.55  | 22.76  | 0.18  | 0.56  | 0.017  | 5.08  | 0.71  | 29.07  | 0.23  | 0.72  | 0.02  |
| <b>digoxin</b>            | 0.21  | -0.68 | 0.25   | -0.25 | -2.71 | -0.003 | 3.69  | 0.57  | -0.21  | 0.21  | 2.27  | 0.00  |
| <b>dihydroergotamine</b>  | 0.23  | -0.64 | 0.47   | 0.30  | -0.69 | -0.005 | 0.00  |       |        |       |       |       |
| <b>diphenhydramin</b>     | 1.88  | 0.27  | 0.79   | 0.13  | 0.28  | 0.022  | 3.66  | 0.56  | 1.62   | 0.27  | 0.57  | 0.05  |
| <b>doxazosin</b>          | 5.51  | 0.74  | -0.52  | 0.35  | 0.76  | 0.006  | 0.22  | -0.66 | 0.46   | -0.31 | -0.67 | -0.01 |
| <b>doxycycline</b>        | 1.68  | 0.23  | -0.10  | -0.12 | 0.25  | 0.001  | 1.76  | 0.24  | -0.10  | -0.13 | 0.27  | 0.00  |
| <b>drotaverine</b>        | 1.91  | 0.28  | -1.19  | -0.19 | 0.32  | 0.006  | 31.24 | 1.49  | -6.33  | -0.99 | 1.71  | 0.03  |
| <b>enalapril</b>          | 0.34  | -0.47 | 0.47   | -0.20 | -0.85 | -0.005 | 0.05  | -1.29 | 1.31   | -0.56 | -2.35 | -0.01 |
| <b>eplerenone</b>         | 0.21  | -0.68 | 0.95   | -0.35 | -1.36 | -0.009 | 1.54  | 0.19  | -0.26  | 0.10  | 0.38  | 0.00  |
| <b>escitalopram</b>       | 2.84  | 0.45  | -13.67 | 0.52  | 0.81  | 0.013  | 32.08 | 1.51  | -45.42 | 1.73  | 2.69  | 0.04  |
| <b>estradiol benzoate</b> |       |       | 0.00   | 0.00  | 0.00  |        | 6.92  | 0.84  | -0.79  | 0.20  | 0.88  | 0.01  |
| <b>estrone</b>            | 11.01 | 1.04  | -1.02  | 0.36  | 1.10  | 0.011  | 29.40 | 1.47  | -1.44  | 0.51  | 1.55  | 0.02  |
| <b>famotidine</b>         | 0.99  | 0.00  | 0.00   | 0.00  | -0.02 | 0.000  | 0.26  | -0.58 | 0.18   | 0.53  | -3.33 | 0.00  |

|                               |       |       |        |       |       |        |       |       |        |       |       |       |
|-------------------------------|-------|-------|--------|-------|-------|--------|-------|-------|--------|-------|-------|-------|
| <b>fexofenadine</b>           | 1.07  | 0.03  | -0.04  | 0.01  | 0.05  | 0.000  | 1.08  | 0.03  | -0.04  | 0.01  | 0.05  | 0.00  |
| <b>fluoxetine</b>             | 6.06  | 0.78  | 3.78   | 0.41  | 0.83  | 0.037  | 66.64 | 1.82  | 8.82   | 0.94  | 1.93  | 0.09  |
| <b>flupenthixol</b>           | 15.36 | 1.19  | -4.16  | 0.22  | 1.25  | 0.023  | 51.21 | 1.71  | -5.99  | 0.32  | 1.80  | 0.03  |
| <b>furosemide</b>             | 11.66 | 1.07  | -0.69  | -4.44 | 1.12  | 0.008  | 0.28  | -0.56 | 0.36   | 2.32  | -0.59 | 0.00  |
| <b>gliclazide</b>             | 9.69  | 0.99  | -1.17  | 0.52  | 1.05  | 0.011  | 0.28  | -0.55 | 0.66   | -0.29 | -0.59 | -0.01 |
| <b>haloperidol</b>            | 4.8   | 0.68  | -6.70  | 0.52  | 0.74  | 0.017  | 23.74 | 1.38  | -13.53 | 1.05  | 1.50  | 0.03  |
| <b>hydrocortisone acetate</b> | 0.66  | -0.18 | 0.43   | -0.04 | -0.19 | -0.003 | 2.82  | 0.45  | -1.07  | 0.11  | 0.47  | 0.01  |
| <b>hydroxyzine</b>            | 3.69  | 0.57  | -20.22 | 0.46  | 0.61  | 0.016  | 13.82 | 1.14  | -40.67 | 0.93  | 1.23  | 0.03  |
| <b>ibuprofen</b>              | 65.66 | 1.82  | -36.49 | 0.47  | 1.91  | 0.049  | 0.86  | -0.07 | 1.34   | -0.02 | -0.07 | 0.00  |
| <b>indomethacin</b>           | 64.78 | 1.81  | -3.85  | -1.27 | 1.87  | 0.028  | 1.08  | 0.03  | -0.07  | -0.02 | 0.03  | 0.00  |
| <b>ketoprofen</b>             | 24.32 | 1.39  | -4.29  | 0.54  | 1.40  | 0.025  | 0.20  | -0.71 | 2.19   | -0.28 | -0.72 | -0.01 |
| <b>ketotifen</b>              | 5.83  | 0.77  | -3.33  | 2.94  | 1.02  | 0.016  | 22.04 | 1.34  | -5.85  | 5.17  | 1.79  | 0.03  |
| <b>lamotrigine</b>            | 1.08  | 0.03  | -0.04  | 0.02  | 0.06  | 0.000  | 0.71  | -0.15 | 0.16   | -0.11 | -0.27 | 0.00  |
| <b>levocetizine</b>           | 1.77  | 0.25  | -0.82  | 0.07  | 0.27  | 0.005  | 3.82  | 0.58  | -1.93  | 0.17  | 0.64  | 0.01  |
| <b>levofloxacin</b>           | 3.94  | 0.60  | -0.95  | 0.96  | 1.92  | 0.008  | 0.90  | -0.04 | 0.07   | -0.07 | -0.14 | 0.00  |
| <b>loperamide</b>             | 4.47  | 0.65  | -4.24  | 0.13  | 0.67  | 0.015  | 0.00  |       |        |       |       |       |
| <b>loratadine</b>             | 10.54 | 1.02  | -7.76  | 3.41  | 1.04  | 0.024  | 11.76 | 1.07  | -8.12  | 3.57  | 1.09  | 0.03  |
| <b>lorazepam</b>              | 2.21  | 0.34  | -0.78  | 0.10  | 0.40  | 0.006  | 9.04  | 0.96  | -2.17  | 0.28  | 1.10  | 0.02  |
| <b>medazepam</b>              | 17.86 | 1.25  | 4.21   | 0.29  | 1.26  | 0.080  | 34.65 | 1.54  | 5.18   | 0.36  | 1.56  | 0.10  |
| <b>meloxicam</b>              | 63.54 | 1.80  | -1.10  | -1.55 | 1.82  | 0.013  | 0.49  | -0.31 | 0.19   | 0.27  | -0.31 | 0.00  |
| <b>methyldopa</b>             | 0.36  | -0.44 | 0.40   | 0.30  | -2.22 | -0.004 | 0.10  | -1.02 | 0.91   | 0.70  | -5.08 | -0.01 |
| <b>mianserin</b>              | 6.39  | 0.81  | 1.82   | 0.86  | 0.90  | 0.124  | 21.72 | 1.34  | 3.02   | 1.42  | 1.49  | 0.21  |
| <b>midazolam</b>              | 3.22  | 0.51  | 3.55   | 0.15  | 0.52  | 0.020  | 5.69  | 0.76  | 5.28   | 0.22  | 0.78  | 0.03  |
| <b>mirtazapine</b>            | 2.96  | 0.47  | 1.99   | 0.41  | 0.55  | 0.024  | 5.83  | 0.77  | 3.23   | 0.66  | 0.90  | 0.04  |
| <b>montelukast</b>            | 0.19  | -0.72 | 1.24   | -0.17 | -0.73 | -0.010 | 99.10 | 2.00  | -3.44  | 0.48  | 2.02  | 0.03  |
| <b>naproxen</b>               | 90.08 | 1.95  | -9.90  | 0.65  | 1.97  | 0.042  | 0.31  | -0.51 | 2.59   | -0.17 | -0.52 | -0.01 |
| <b>nebivolol</b>              | 7.49  | 0.87  | -1.49  | -0.85 | 0.89  | 0.012  | 0.00  |       |        |       |       |       |
| <b>olanzapine</b>             | 4.83  | 0.68  | -0.86  | -0.44 | 3.91  | 0.008  | 20.31 | 1.31  | -1.64  | -0.84 | 7.47  | 0.02  |
| <b>oxazepam</b>               | 1.65  | 0.22  | -0.49  | 0.07  | 0.26  | 0.004  | 4.78  | 0.68  | -1.54  | 0.23  | 0.80  | 0.01  |
| <b>oxybutinin</b>             | 4.01  | 0.60  | -2.42  | 0.19  | 0.66  | 0.012  | 49.68 | 1.70  | -6.80  | 0.52  | 1.84  | 0.03  |
| <b>pantoprazole</b>           | 2.09  | 0.32  | -0.38  | -0.17 | 0.33  | 0.004  | 2.19  | 0.34  | -0.41  | -0.18 | 0.35  | 0.00  |

|                       |       |       |       |       |       |        |        |       |        |       |       |       |
|-----------------------|-------|-------|-------|-------|-------|--------|--------|-------|--------|-------|-------|-------|
| <b>paracetamol</b>    | 0.28  | -0.55 | 2.28  | 0.42  | -2.21 | -0.011 | 0.32   | -0.49 | 2.03   | 0.37  | -1.97 | -0.01 |
| <b>paroxetine</b>     | 5.96  | 0.78  | -8.76 | -1.58 | 0.82  | 0.020  | 115.77 | 2.06  | -23.31 | -4.21 | 2.20  | 0.05  |
| <b>pergolide</b>      | 0.07  | -1.15 | 7.12  | -0.50 | -1.28 | -0.026 | 0.00   |       |        |       |       |       |
| <b>perindopril</b>    | 0.49  | -0.31 | 0.31  | -0.15 | -2.07 | -0.003 | 0.18   | -0.76 | 0.77   | -0.37 | -5.05 | -0.01 |
| <b>phenytoin</b>      | 1.63  | 0.21  | -0.55 | 0.29  | 0.24  | 0.004  | 1.78   | 0.25  | -0.65  | 0.34  | 0.28  | 0.00  |
| <b>pindolol</b>       | 1.65  | 0.22  | -0.59 | -0.18 | 0.54  | 0.004  | 6.09   | 0.78  | -2.12  | -0.64 | 1.96  | 0.01  |
| <b>piroxicam</b>      | 32.92 | 1.52  | -1.29 | 1.42  | 1.53  | 0.014  | 0.16   | -0.79 | 0.67   | -0.74 | -0.80 | -0.01 |
| <b>prednisolone</b>   | 0.52  | -0.28 | 0.29  | -0.14 | -0.32 | -0.003 | 2.84   | 0.45  | -0.47  | 0.23  | 0.50  | 0.00  |
| <b>progesterone</b>   | 5.7   | 0.76  | -3.83 | 0.24  | 0.78  | 0.016  | 34.99  | 1.54  | -7.82  | 0.49  | 1.58  | 0.03  |
| <b>promazine</b>      | 8.9   | 0.95  | 24.65 | 0.29  | 1.01  | 0.030  | 0.10   | -1.02 | -26.48 | -0.31 | -1.08 | -0.03 |
| <b>promethazine</b>   | 5.35  | 0.73  | 18.91 | -3.64 | 0.78  | 0.023  | 14.96  | 1.17  | 30.50  | -5.87 | 1.26  | 0.04  |
| <b>propafenone</b>    | 3.23  | 0.51  | -1.31 | 0.27  | 0.52  | 0.009  | 66.74  | 1.82  | -4.68  | 0.98  | 1.88  | 0.03  |
| <b>propranolol</b>    | 3.48  | 0.54  | -4.64 | 0.19  | 0.60  | 0.013  | 28.09  | 1.45  | -12.40 | 0.52  | 1.61  | 0.03  |
| <b>quetiapine</b>     | 2.48  | 0.39  | -0.63 | 0.14  | 0.48  | 0.005  | 17.02  | 1.23  | -1.95  | 0.43  | 1.48  | 0.02  |
| <b>quinapril</b>      | 3.1   | 0.49  | -0.50 | 0.29  | 0.51  | 0.005  | 1.22   | 0.09  | -0.09  | 0.05  | 0.09  | 0.00  |
| <b>risperidone</b>    | 2.11  | 0.32  | -0.73 | 0.51  | 0.37  | 0.005  | 4.83   | 0.68  | -1.54  | 1.09  | 0.78  | 0.01  |
| <b>rizatriptan</b>    | 2.06  | 0.31  | -0.79 | -1.16 | 2.24  | 0.005  | 2.53   | 0.40  | -1.01  | -1.49 | 2.88  | 0.01  |
| <b>rosuvastatin</b>   | 1.96  | 0.29  | -0.17 | 0.25  | 0.33  | 0.002  | 0.96   | -0.02 | 0.01   | -0.02 | -0.02 | 0.00  |
| <b>roxitromicin</b>   | 1.03  | 0.01  | 0.00  | 0.00  | 0.01  | 0.000  | 0.00   |       |        |       |       |       |
| <b>rupatadine</b>     | 12.38 | 1.09  | 13.22 | 0.67  | 1.11  | 0.038  | 9.29   | 0.97  | 11.71  | 0.59  | 0.98  | 0.03  |
| <b>sertraline</b>     | 13.19 | 1.12  | 3.16  | 0.67  | 1.14  | 0.093  | 42.89  | 1.63  | 4.60   | 0.97  | 1.67  | 0.14  |
| <b>sildenafil</b>     | 1.62  | 0.21  | -0.17 | -0.14 | 0.22  | 0.002  | 14.26  | 1.15  | -0.96  | -0.79 | 1.20  | 0.01  |
| <b>simvastatin</b>    | 8.72  | 0.94  | -1.52 | 0.21  | 0.99  | 0.013  | 13.21  | 1.12  | -1.81  | 0.25  | 1.18  | 0.02  |
| <b>spironolactone</b> | 0.82  | -0.09 | 0.10  | -0.03 | -0.10 | -0.001 | 13.38  | 1.13  | -1.37  | 0.34  | 1.25  | 0.01  |
| <b>sulpiride</b>      | 1.45  | 0.16  | -0.13 | 0.34  | 0.40  | 0.001  | 1.66   | 0.22  | -0.18  | 0.46  | 0.55  | 0.00  |
| <b>telmisartan</b>    | 22.51 | 1.35  | -2.93 | 0.18  | 1.36  | 0.021  | 4.68   | 0.67  | -1.45  | 0.09  | 0.67  | 0.01  |
| <b>temazepam</b>      | 1.26  | 0.10  | -0.33 | 0.03  | 0.10  | 0.002  | 6.74   | 0.83  | -2.77  | 0.26  | 0.86  | 0.02  |
| <b>theophylline</b>   | 0.22  | -0.66 | 1.17  | 0.50  | -1.64 | -0.009 | 0.12   | -0.94 | 1.67   | 0.72  | -2.35 | -0.01 |
| <b>thioridazine</b>   | 18.57 | 1.27  | -3.46 | 0.30  | 1.34  | 0.022  | 47.61  | 1.68  | -4.58  | 0.40  | 1.77  | 0.03  |
| <b>tolterodine</b>    | 2.9   | 0.46  | 2.70  | 0.14  | 0.48  | 0.020  | 0.21   | -0.68 | -3.95  | -0.21 | -0.70 | -0.03 |
| <b>trazodone</b>      | 2.22  | 0.35  | -2.64 | 0.12  | 0.38  | 0.008  | 9.30   | 0.97  | -7.38  | 0.35  | 1.05  | 0.02  |



|                       |       |       |        |       |       |        |       |       |       |       |       |       |
|-----------------------|-------|-------|--------|-------|-------|--------|-------|-------|-------|-------|-------|-------|
| <b>tropicamid</b>     | 0.15  | -0.82 | 2.68   | 82.39 | -1.83 | -0.015 | 1.06  | 0.03  | -0.09 | -2.68 | 0.06  | 0.00  |
| <b>valproic acid</b>  | 4.46  | 0.65  | -13.04 | 0.25  | 0.76  | 0.017  | 0.08  | -1.09 | 21.90 | -0.42 | -1.28 | -0.03 |
| <b>valsartan</b>      | 48.78 | 1.69  | -1.35  | 0.44  | 1.77  | 0.015  | 0.08  | -1.10 | 0.88  | -0.28 | -1.15 | -0.01 |
| <b>venlafaxine</b>    | 1.05  | 0.02  | 0.89   | 0.01  | 0.08  | 0.001  | 8.25  | 0.92  | 38.52 | 0.64  | 3.40  | 0.03  |
| <b>verapamil</b>      | 2.22  | 0.35  | -0.73  | 0.61  | 0.38  | 0.005  | 11.97 | 1.08  | -2.26 | 1.89  | 1.20  | 0.02  |
| <b>zolmitriptane</b>  | 1.7   | 0.23  | -0.62  | -0.23 | 0.92  | 0.004  | 3.30  | 0.52  | -1.40 | -0.51 | 2.07  | 0.01  |
| <b>zolpidem</b>       | 1.77  | 0.25  | -4.53  | 0.29  | 0.27  | 0.007  | 2.60  | 0.42  | -7.58 | 0.48  | 0.45  | 0.01  |
| <b>zopiclone</b>      | 0.76  | -0.12 | 0.13   | -0.05 | -0.26 | -0.001 | 0.91  | -0.04 | 0.04  | -0.02 | -0.09 | 0.00  |
| <b>zuclopenthixol</b> | 16.18 | 1.21  | -4.24  | 0.24  | 1.23  | 0.023  | 48.73 | 1.69  | -5.92 | 0.34  | 1.71  | 0.03  |

**Table S6.** Biological properties for APIs from the external group (n = 38). An external API group (n = 38) was assembled at a later time than previous one (n = 129).

| API                 | B1    | B2    | B3    | BB <sub>vivo</sub> | CNS+/- | LactMed | LLL H | log U/D<br>7.2 | M/P  | PB   | PhCharge |
|---------------------|-------|-------|-------|--------------------|--------|---------|-------|----------------|------|------|----------|
| acetazolamid        | -1.60 | -1.29 | 0.52  |                    | 1      | 1       | 2     | -0.24          | 0.28 | 0.98 | -1       |
| amitriptyline       | 0.76  | 0.50  | -0.45 | 0.89               | 1      | 1       | 2     | -1.98          | 0.92 | 0.95 | 1        |
| bupivacaine         | 0.16  | 0.03  | 1.25  |                    | 1      | 1       | 2     | -0.93          | 0.37 | 0.95 | 1        |
| chloroquine         | 0.39  | 0.10  | 0.89  |                    | 1      | 1       | 2     | -3.27          | 2.65 | 0.55 | 2        |
| citalopram          | 0.13  | -0.03 | -0.23 |                    | 1      | 2       | 2     | -2.37          | 1.03 | 0.80 | 1        |
| clomipramine        | 0.79  | 0.44  | -0.28 |                    | 1      | 1       | 2     | -2.26          | 1.13 | 0.98 | 1        |
| colchicine          | -0.93 | -0.78 | -1.99 |                    | 1      | 2       | 4     |                | 0.95 | 0.39 | 0        |
| diltiazem           | -0.02 | -0.40 | -1.22 |                    | 1      | 1       | 3     | -1.74          | 0.99 | 0.75 | 1        |
| doxepin             | 0.54  | 0.35  | -0.18 |                    | 1      | 1       | 5     | -2.20          | 1.37 | 0.76 | 1        |
| duloxetine          | 0.56  | 0.21  | -0.65 |                    | 1      | 1       | 3     | -2.82          | 0.78 | 0.90 | 1        |
| eletriptan          | -0.19 | -0.30 | -0.84 |                    | 1      | 1       | 3     | -3.15          | 0.25 | 0.85 | 1        |
| ethambutol          | -0.86 | -0.49 | -0.52 |                    | 0      | 1       | 2     | -2.39          | 1.00 | 0.25 | 1        |
| ethanol             | -0.19 | 0.22  | -0.67 | -0.16              | 1      | 2       | 3     |                | 0.95 | 0.00 | 0        |
| fluvoxamine         | -0.14 | -0.36 | 0.68  |                    | 1      | 1       | 2     | -2.19          | 1.33 | 0.79 | 1        |
| gabapentin          | -0.63 | -0.47 | -0.19 |                    | 1      | 1       | 2     | -0.29          | 1.00 | 0.03 | 0        |
| gentamycin          | -3.13 | -2.65 | -2.40 |                    | 0      | 1       | 2     | -2.57          | 0.36 | 0.15 | 5        |
| hydrochlorothiazide | -1.62 | -1.35 | -2.29 |                    | 0      | 1       | 2     | -1.75          | 0.38 | 0.68 | 0        |
| itraconazole        | -0.66 | -1.07 | 3.68  |                    | 0      | 1       | 2     | -0.73          | 1.14 | 1.00 | 0        |
| ketorolac           | -0.33 | -0.40 | 0.23  |                    | 1      | 1       | 2     | -2.91          | 0.03 | 0.99 | -1       |
| levetiracetam       | -0.93 | -0.47 | -1.02 |                    | 1      | 1       | 3     |                | 1.00 | 0.10 | 0        |
| lincomycin          | -1.62 | -1.47 | -0.43 |                    | 0      |         | 2     | -1.58          | 0.15 | 0.70 | 1        |
| mesalazine          | -0.99 | -0.79 | -1.55 |                    | 0      | 1       | 3     | -5.30          | 2.69 | 0.43 | -1       |
| minoxidil           | -1.00 | -0.95 | -0.18 |                    | 1      |         | 3     | -1.66          | 0.82 | 0.00 | 0        |
| nitrendipine        | -0.92 | -1.22 | -1.09 |                    | 0      | 1       | 2     | -4.41          | 0.30 | 0.99 | 0        |
| ofloxacin           | -0.66 | -0.63 | -1.97 |                    | 0      | 1       | 2     | -2.01          | 1.26 | 0.32 | -1       |

|                         |       |       |       |  |   |   |   |       |      |      |    |
|-------------------------|-------|-------|-------|--|---|---|---|-------|------|------|----|
| <b>oxcarbamazepine</b>  | -0.55 | -0.47 | -0.87 |  | 1 |   | 3 | -6.53 | 0.50 | 0.40 | 0  |
| <b>pefloxacin</b>       | -0.52 | -0.48 | -1.44 |  | 0 |   |   | -7.04 | 0.96 | 0.25 | -1 |
| <b>pregabalin</b>       | -0.63 | -0.47 | -0.22 |  | 1 | 1 | 3 | -0.57 | 0.55 | 0.00 | 0  |
| <b>primidone</b>        | -0.60 | -0.38 | -0.31 |  | 1 | 2 | 3 | -5.06 | 0.72 | 0.70 | 0  |
| <b>propylthiouracil</b> | -0.29 | -0.11 | -0.31 |  | 1 | 1 | 2 | -0.43 | 0.17 | 0.82 | 0  |
| <b>quinine</b>          | -0.11 | -0.18 | -0.07 |  | 1 | 1 | 2 | -2.08 | 0.23 | 0.70 | 1  |
| <b>rifampicin</b>       | -2.81 | -2.98 | -0.67 |  | 0 | 1 | 2 | -2.24 | 0.40 | 0.89 | 1  |
| <b>rimantadine</b>      | 0.26  | 0.13  | 0.43  |  | 1 |   | 3 | -3.56 | 2.00 | 0.40 | 1  |
| <b>timolol</b>          | -0.85 | -0.73 | -0.06 |  | 0 | 1 | 2 | -2.15 | 0.80 | 0.10 | 1  |
| <b>tinidazole</b>       | -1.35 | -1.02 | -0.65 |  | 1 | 1 | 3 | -4.90 | 1.14 | 0.12 | 0  |
| <b>tramadol</b>         | 0.01  | 0.02  | -0.67 |  | 1 | 1 | 2 | -2.41 | 2.30 | 0.20 | 1  |
| <b>trimethoprim</b>     | -1.33 | -1.14 | -1.90 |  | 1 | 1 | 2 | -0.30 | 1.25 | 0.44 | 1  |
| <b>warfarin</b>         | -0.33 | -0.47 | -0.44 |  | 1 | 0 | 2 | -2.70 | 0.00 | 0.99 | -1 |

**Table S7.** Physicochemical properties for APIs from the external group (n = 38).

| API                | a/b/n<br>code <sup>1</sup> | DM   | eH    | eH-eL  | eL <sup>2</sup> | HA | HD | log D | log P | MW <sup>3</sup> | pKa   | PSA <sup>4</sup> | Sa <sup>3</sup> | V <sup>3</sup> |
|--------------------|----------------------------|------|-------|--------|-----------------|----|----|-------|-------|-----------------|-------|------------------|-----------------|----------------|
| acetazolamid       | 0                          | 0.89 | -9.06 | -9.13  | 0.69            | 5  | 2  | -0.55 | -0.26 | 2.22            | 7.44  | 11.50            | 4.69            | 2.9            |
| amitriptyline      | 1                          | 6.42 | -9.9  | -8.20  | -17.01          | 1  | 0  | 3.15  | 4.41  | 2.77            | 9.18  | 0.32             | 3.61            | 1.56           |
| bupivacaine        | 0                          | 3.02 | -9.03 | -9.37  | 3.37            | 2  | 1  | 2.80  | 3.31  | 2.88            | 8.13  | 3.23             | 4.78            | 3.02           |
| chloroquine        | 1                          | 4.4  | -8.6  | -8.03  | -5.71           | 3  | 1  | 1.87  | 4.41  | 3.20            | 10.47 | 2.82             | 5.94            | 3.11           |
| citalopram         | 1                          | 2.83 | -7.98 | -8.86  | 8.83            | 3  | 0  | 0.39  | 3.48  | 3.24            | 9.57  | 3.63             | 5.88            | 3.14           |
| clomipramine       | 1                          | 1.53 | -8.49 | -8.65  | 1.56            | 2  | 0  | 3.50  | 4.94  | 3.15            | 9.46  | 0.65             | 5.11            | 3.05           |
| colchicine         | 0                          | 5.95 | -9.11 | -8.52  | -5.91           | 6  | 1  | 0.92  | 1.07  | 3.99            |       | 8.31             | 5.47            | 3.61           |
| diltiazem          | 1                          | 2.43 | -8.71 | -8.52  | -1.86           | 4  | 0  | 2.10  | 4.73  | 4.15            | 8.94  | 5.91             | 6.17            | 3.96           |
| doxepin            | 1                          | 0.31 | -9.11 | -9.03  | -0.81           | 2  | 0  | 2.08  | 3.84  | 2.79            | 9.40  | 1.25             | 4.69            | 2.81           |
| duloxetine         | 1                          | 0.96 | -9.01 | -8.63  | -3.82           | 2  | 1  | 1.24  | 4.81  | 2.97            | 10.02 | 2.13             | 4.56            | 2.84           |
| eletriptan         | 1                          | 4.88 | -8.5  | -7.90  | -5.96           | 3  | 1  | 0.36  | 2.98  | 3.83            | 10.35 | 5.32             | 4.69            | 3.57           |
| ethambutol         | 1                          | 1.11 | -9.11 | -11.45 | 23.39           | 4  | 4  | -2.21 | -0.29 | 2.04            | 9.59  | 6.45             | 4.95            | 2.18           |
| ethanol            | 0                          |      |       |        |                 | 1  | 1  | -0.19 | -0.18 | 0.46            |       | 2.02             |                 |                |
| flvoxamine         | 1                          | 3.9  | -9.69 | -8.87  | -8.25           | 4  | 1  | 1.15  | 3.71  | 3.18            | 9.39  | 5.68             | 5.89            | 2.79           |
| gabapentin         | 0                          | 1.56 | -9.35 | -10.19 | 8.36            | 3  | 2  | -1.31 | 1.08  | 1.71            | 7.50  | 6.33             | 2.38            | 1.7            |
| gentamycin         | 1                          | 4.31 | -9.34 | -11.20 | 18.62           | 12 | 8  | -7.81 | -2.04 | 4.78            | 9.77  | 19.97            | 4.71            | 4.25           |
| hydrochlorotiazide | 0                          | 7.27 | -9.64 | -8.46  | -11.83          | 5  | 3  | -0.09 | -0.02 | 2.98            | 8.95  | 11.84            | 3.85            | 2.01           |
| itraconazole       | 0                          | 6.11 | -8.42 | -7.65  | -7.7            | 9  | 0  | 4.26  | 4.53  | 6.73            | 6.47  | 10.08            | 8.43            | 6.15           |
| ketorolac          | -1                         | 2.14 | -9.19 | -8.83  | -3.63           | 3  | 1  | -0.95 | 2.68  | 2.55            | 4.29  | 5.93             | 3.87            | 2.39           |
| levetiracetam      | 0                          | 5.71 | -9.8  | -10.45 | 6.49            | 2  | 1  | -0.67 | -0.88 | 1.70            |       | 6.34             | 3.09            | 1.62           |
| lincomycin         | 1                          | 3.92 | -8.5  | -8.50  | 0.04            | 8  | 5  | -0.48 | 0.72  | 4.07            | 8.78  | 12.60            | 6.35            | 3.89           |
| mesalazine         | -1                         | 3.8  | -8.18 | -8.06  | -1.23           | 4  | 3  | -2.61 | 0.74  | 1.53            | 1.90  | 8.36             | 2.49            | 1.28           |
| minoxidil          | 0                          | 4.2  | -8.07 | -8.10  | 0.29            | 5  | 2  | 0.65  | 1.62  | 2.09            | 5.54  | 9.36             | 3.16            | 1.96           |
| nitrendipine       | 0                          | 6.92 | -9.09 | -8.00  | -10.94          | 5  | 1  | 3.50  | 3.81  | 3.60            | 2.79  | 11.05            | 5.3             | 2.98           |
| ofloxacin          | -1                         | 4.68 | -8.72 | -7.82  | -8.97           | 7  | 1  | -0.65 | 1.85  | 3.61            | 5.19  | 7.33             | 4.74            | 3.07           |
| oxcarbamazepine    | 0                          | 3.46 | -9.31 | -8.84  | -4.73           | 2  | 1  | 1.25  | 1.66  | 2.52            | 13.73 | 6.34             | 3.02            | 2.26           |
| pefloxacin         | -1                         | 9.41 | -9.01 | -7.97  | -10.45          | 6  | 1  | 0.52  | 1.92  | 3.33            | 0.16  | 6.41             | 4.66            | 2.91           |
| pregabalin         | 0                          | 1.67 | -9.53 | -10.46 | 9.29            | 3  | 2  | -1.38 | 1.09  | 1.59            | 7.77  | 6.33             | 3.54            | 1.65           |

|                         |    |      |        |        |        |    |   |       |       |      |       |       |      |      |
|-------------------------|----|------|--------|--------|--------|----|---|-------|-------|------|-------|-------|------|------|
| <b>primidone</b>        | 0  | 2.84 | -9.78  | -9.77  | -0.15  | 2  | 2 | 0.40  | 0.83  | 2.18 | 12.26 | 5.82  | 3.19 | 2.02 |
| <b>propylthiouracil</b> | 0  | 5.57 | -9.2   | -7.93  | -12.71 | 1  | 2 | 1.18  | 1.15  | 1.70 | 7.63  | 4.11  | 3.32 | 1.51 |
| <b>quinine</b>          | 1  | 1.73 | -9.55  | -9.54  | -0.14  | 4  | 1 | 1.58  | 2.82  | 3.24 | 9.28  | 4.56  | 4.22 | 3.06 |
| <b>rifampicin</b>       | -1 |      |        |        |        | 14 | 6 | -0.46 | 2.05  | 8.23 | 4.96  | 22.02 |      |      |
| <b>rimantadine</b>      | 1  | 1.22 | -9.33  | -12.28 | 29.54  | 1  | 1 | 0.08  | 3.31  | 1.79 | 10.76 | 2.60  | 2.43 | 1.91 |
| <b>timolol</b>          | 1  | 3.06 | -9.17  | -8.05  | -11.24 | 7  | 2 | -1.39 | 1.28  | 3.16 | 9.35  | 7.97  | 4.95 | 2.88 |
| <b>tinidazole</b>       | 0  | 2.34 | -10.52 | -9.24  | -12.82 | 5  | 0 | -0.27 | -0.29 | 2.47 | 2.30  | 9.78  | 4.41 | 2    |
| <b>tramadol</b>         | 1  |      |        |        |        | 3  | 1 | 0.36  | 2.32  | 2.63 | 9.61  | 3.27  |      |      |
| <b>trimethoprim</b>     | 0  | 2.09 | -8.8   | -8.68  | -1.22  | 7  | 2 | 0.58  | 0.59  | 2.90 | 6.90  | 10.55 | 4.14 | 2.63 |
| <b>warfarin</b>         | -1 | 4.12 | -7.38  | -6.05  | -13.35 | 3  | 1 | -0.90 | 3.13  | 3.08 | 4.50  | 6.36  | 4.01 | 2.76 |

1 – code describing the acid-base properties: (-1) - acids; (0) - neutral drugs; (1) - bases

2 – value multiplied by 10

3 – value divided by 100

4 – value divided by 10

**Table S8.** Chromatographic data and their derivatives obtained from the NP TLC and RP TLC experiment for the external group of APIs (n = 38).

| API                | C <sub>NP</sub> <sup>*</sup> | NP <sup>**</sup> | NP/C | NP/PSA | C <sub>RP</sub> <sup>*</sup> | RP <sup>**</sup> | RP/C | RP/PSA | NP/B2  | RP/B2   | NP/PB  | RP/PB  | NP/logP | RP/logP |
|--------------------|------------------------------|------------------|------|--------|------------------------------|------------------|------|--------|--------|---------|--------|--------|---------|---------|
| acetazolamid       | 0.94                         | 0.94             | 1.00 | 0.817  | 0.97                         | 0.96             | 0.99 | 0.834  | -0.727 | -0.742  | 0.959  | 0.980  | -3.615  | -3.692  |
| amitriptyline      | 0.32                         | 0.31             | 0.97 | 9.568  | 0.67                         | 0.63             | 0.94 | 19.444 | 0.626  | 1.272   | 0.326  | 0.663  | 0.070   | 0.143   |
| bupivacaine        | 0.67                         | 0.67             | 1.00 | 2.072  | 0.74                         | 0.75             | 1.01 | 2.319  | 22.666 | 25.372  | 0.705  | 0.789  | 0.202   | 0.227   |
| chloroquine        | 0.17                         | 0.17             | 1.00 | 0.604  | 0.40                         | 0.30             | 0.75 | 1.065  | 1.763  | 3.111   | 0.309  | 0.545  | 0.039   | 0.068   |
| citalopram         | 0.30                         | 0.29             | 0.97 | 0.800  | 0.62                         | 0.60             | 0.97 | 1.655  | -8.745 | -18.094 | 0.363  | 0.750  | 0.083   | 0.172   |
| clomipramine       | 0.33                         | 0.32             | 0.97 | 4.938  | 0.59                         | 0.59             | 1.00 | 9.105  | 0.722  | 1.331   | 0.327  | 0.602  | 0.065   | 0.119   |
| colchicine         | 0.79                         | 0.77             | 0.97 | 0.927  | 0.91                         | 0.91             | 1.00 | 1.095  | -0.984 | -1.163  | 1.974  | 2.333  | 0.720   | 0.850   |
| diltiazem          | 0.49                         | 0.49             | 1.00 | 0.829  | 0.76                         | 0.72             | 0.95 | 1.219  | -1.230 | -1.808  | 0.653  | 0.960  | 0.104   | 0.152   |
| doxepin            | 0.30                         | 0.31             | 1.03 | 2.486  | 0.58                         | 0.54             | 0.93 | 4.330  | 0.892  | 1.554   | 0.411  | 0.715  | 0.081   | 0.141   |
| duloxetine         | 0.32                         | 0.33             | 1.03 | 1.552  | 0.57                         | 0.53             | 0.93 | 2.493  | 1.595  | 2.562   | 0.367  | 0.589  | 0.069   | 0.110   |
| eletriptan         | 0.29                         | 0.28             | 0.97 | 0.527  | 0.62                         | 0.62             | 1.00 | 1.166  | -0.922 | -2.041  | 0.329  | 0.729  | 0.094   | 0.208   |
| ethambutol         | 0.19                         | 0.21             | 1.11 | 0.325  | 0.97                         | 0.95             | 0.98 | 1.472  | -0.433 | -1.957  | 0.840  | 3.800  | -0.724  | -3.276  |
| ethanol            |                              |                  |      |        |                              |                  |      |        |        |         |        |        |         |         |
| fluvoxamine        | 0.34                         | 0.32             | 0.94 | 0.563  | 0.62                         | 0.62             | 1.00 | 1.091  | -0.883 | -1.711  | 0.408  | 0.790  | 0.086   | 0.167   |
| gabapentin         | 0.91                         | 0.91             | 1.00 | 1.437  | 0.66                         | 0.66             | 1.00 | 1.042  | -1.952 | -1.416  | 30.333 | 22.000 | 0.843   | 0.611   |
| gentamycin         | 0.96                         | 0.94             | 0.98 | 0.471  | 0.91                         | 0.90             | 0.99 | 0.451  | -0.355 | -0.340  | 6.267  | 6.000  | -0.461  | -0.441  |
| hydrochlorotiazide | 0.96                         | 0.96             | 1.00 | 0.811  | 0.97                         | 0.96             | 0.99 | 0.811  | -0.713 | -0.713  | 1.414  | 1.414  | -48.000 | -48.000 |
| itraconazole       | 0.96                         | 0.97             | 1.01 | 0.962  | 0.86                         | 0.84             | 0.98 | 0.833  | -0.910 | -0.788  | 0.972  | 0.842  | 0.214   | 0.185   |
| ketorolac          | 0.92                         | 0.91             | 0.99 | 1.535  | 0.96                         | 0.96             | 1.00 | 1.619  | -2.265 | -2.389  | 0.919  | 0.970  | 0.340   | 0.358   |
| levetiracetam      | 0.92                         | 0.92             | 1.00 | 1.451  | 0.92                         | 0.92             | 1.00 | 1.451  | -1.968 | -1.968  | 9.200  | 9.200  | -1.045  | -1.045  |
| lincomycin         | 0.91                         | 0.91             | 1.00 | 0.722  | 0.94                         | 0.94             | 1.00 | 0.746  | -0.620 | -0.640  | 1.300  | 1.343  | 1.264   | 1.306   |
| mesalazine         | 0.94                         | 0.93             | 0.99 | 1.113  | 0.99                         | 0.97             | 0.98 | 1.161  | -1.178 | -1.228  | 2.163  | 2.256  | 1.257   | 1.311   |
| minoxidil          | 0.43                         | 0.42             | 0.98 | 0.449  | 0.80                         | 0.82             | 1.03 | 0.876  | -0.442 | -0.862  |        |        | 0.259   | 0.506   |
| nitrendipine       | 0.97                         | 0.97             | 1.00 | 0.878  | 0.86                         | 0.86             | 1.00 | 0.779  | -0.795 | -0.705  | 0.980  | 0.869  | 0.255   | 0.226   |
| ofloxacin          | 0.24                         | 0.23             | 0.96 | 0.314  | 0.54                         | 0.50             | 0.93 | 0.682  | -0.367 | -0.799  | 0.719  | 1.563  | 0.124   | 0.270   |
| oxcarbamazepine    | 0.91                         | 0.90             | 0.99 | 1.420  | 0.91                         | 0.91             | 1.00 | 1.435  | -1.926 | -1.947  | 2.250  | 2.275  | 0.542   | 0.548   |
| pefloxacin         | 0.30                         | 0.29             | 0.97 | 0.452  | 0.76                         | 0.70             | 0.92 | 1.092  | -0.606 | -1.463  | 1.160  | 2.800  | 0.151   | 0.365   |
| pregabalin         | 0.76                         | 0.76             | 1.00 | 1.200  | 0.41                         | 0.41             | 1.00 | 0.648  | -1.630 | -0.880  |        |        | 0.697   | 0.376   |

|                         |      |      |      |       |      |      |      |       |        |        |       |       |        |        |
|-------------------------|------|------|------|-------|------|------|------|-------|--------|--------|-------|-------|--------|--------|
| <b>primidone</b>        | 0.90 | 0.93 | 1.03 | 1.598 | 0.93 | 0.97 | 1.04 | 1.667 | -2.421 | -2.525 | 1.329 | 1.386 | 1.120  | 1.169  |
| <b>propylthiouracil</b> | 0.94 | 0.94 | 1.00 | 2.285 | 0.93 | 0.93 | 1.00 | 2.261 | -8.462 | -8.372 | 1.146 | 1.134 | 0.817  | 0.809  |
| <b>quinine</b>          | 0.30 | 0.29 | 0.97 | 0.636 | 0.66 | 0.64 | 0.97 | 1.404 | -1.590 | -3.508 | 0.414 | 0.914 | 0.103  | 0.227  |
| <b>rifampicin</b>       | 0.73 | 0.77 | 1.05 | 0.350 | 0.95 | 0.94 | 0.99 | 0.427 | -0.259 | -0.316 | 0.865 | 1.056 | 0.376  | 0.459  |
| <b>rimantadine</b>      | 0.92 | 0.92 | 1.00 | 3.536 | 0.95 | 0.95 | 1.00 | 3.651 | 7.040  | 7.270  | 2.300 | 2.375 | 0.278  | 0.287  |
| <b>timolol</b>          | 0.34 | 0.32 | 0.94 | 0.401 | 0.97 | 0.97 | 1.00 | 1.216 | -0.439 | -1.331 | 3.200 | 9.700 | 0.250  | 0.758  |
| <b>tinidazole</b>       | 0.89 | 0.88 | 0.99 | 0.900 | 0.94 | 0.93 | 0.99 | 0.951 | -0.865 | -0.914 | 7.333 | 7.750 | -3.034 | -3.207 |
| <b>tramadol</b>         | 0.31 | 0.31 | 1.00 | 0.948 | 0.63 | 0.64 | 1.02 | 1.957 | 13.025 | 26.891 | 1.550 | 3.200 | 0.134  | 0.276  |
| <b>trimethoprim</b>     | 0.57 | 0.59 | 1.04 | 0.559 | 0.84 | 0.83 | 0.99 | 0.787 | -0.517 | -0.727 | 1.341 | 1.886 | 1.000  | 1.407  |
| <b>warfarin</b>         | 0.99 | 0.99 | 1.00 | 1.557 | 0.87 | 0.83 | 0.95 | 1.305 | -2.104 | -1.764 | 1.000 | 0.838 | 0.316  | 0.265  |

\* R<sub>f</sub> value from the non-impregnated NP or RP plate (control)

\*\* R<sub>f</sub> value from the NP or RP plate impregnated with 2 mg/mL BSA solution

**Table S9.** Chromatographic data from HPLC<sub>HSA</sub> and HPLC<sub>IAM</sub> experiments and their derivatives obtained for 38 external APIs.

| API                | k <sub>HSA</sub> | log k <sub>HSA</sub> | log k <sub>HSA</sub> /B2 | log k <sub>HSA</sub> /PB | log k <sub>HSA</sub> /log P | k <sub>IAM</sub> | log k <sub>IAM</sub> |
|--------------------|------------------|----------------------|--------------------------|--------------------------|-----------------------------|------------------|----------------------|
| acetazolamid       | 0.74             | -0.13                | -0.575                   | 0.760                    | -2.863                      | 2.90             | 0.46                 |
| amitriptyline      | 5.87             | 0.77                 | 11.854                   | 6.178                    | 1.331                       | 1.56             | 0.19                 |
| bupivacaine        | 1.18             | 0.07                 | 40.084                   | 1.247                    | 0.358                       | 3.02             | 0.48                 |
| chloroquine        | 18.05            | 1.26                 | 187.127                  | 32.812                   | 4.092                       | 3.11             | 0.49                 |
| citalopram         | 2.67             | 0.43                 | -80.418                  | 3.333                    | 0.766                       | 3.14             | 0.50                 |
| clomipramine       | 9.09             | 0.96                 | 20.510                   | 9.278                    | 1.841                       | 3.05             | 0.48                 |
| colchicine         | 0.28             | -0.55                | -0.362                   | 0.726                    | 0.265                       | 3.61             | 0.56                 |
| diltiazem          | 1.74             | 0.24                 | -4.362                   | 2.316                    | 0.367                       | 3.96             | 0.60                 |
| doxepin            | 4.25             | 0.63                 | 12.220                   | 5.624                    | 1.106                       | 2.81             | 0.45                 |
| duloxetine         | 8.16             | 0.91                 | 39.435                   | 9.063                    | 1.696                       | 2.84             | 0.45                 |
| eletriptan         | 3.78             | 0.58                 | -12.429                  | 4.441                    | 1.267                       | 3.57             | 0.55                 |
| ethambutol         | 1.73             | 0.24                 | -3.557                   | 6.906                    | -5.953                      | 2.18             | 0.34                 |
| ethanol            | 0.02             | -1.76                | 0.078                    |                          | -0.097                      | 0.01             | -2.09                |
| fluvoxamine        | 0.25             | -0.60                | -0.696                   | 0.321                    | 0.068                       | 2.79             | 0.45                 |
| gabapentin         | 0.15             | -0.84                | -0.312                   | 4.843                    | 0.135                       | 1.70             | 0.23                 |
| gentamycin         | 1.50             | 0.18                 | -0.568                   | 10.028                   | -0.737                      | 4.25             | 0.63                 |
| hydrochlorotiazide | 0.61             | -0.22                | -0.452                   | 0.897                    | -30.451                     | 2.01             | 0.30                 |
| itraconazole       | 9.65             | 0.98                 | -9.055                   | 9.668                    | 2.130                       | 6.15             | 0.79                 |
| ketorolac          | 9.65             | 0.98                 | -24.017                  | 9.747                    | 3.601                       | 2.39             | 0.38                 |
| levetiracetam      | 0.07             | -1.16                | -0.149                   | 0.696                    | -0.079                      | 1.62             | 0.21                 |
| lincomycin         | 0.82             | -0.08                | -0.560                   | 1.175                    | 1.142                       | 3.89             | 0.59                 |
| mesalazine         | 0.18             | -0.73                | -0.234                   | 0.430                    | 0.250                       | 1.28             | 0.11                 |
| minoxidil          | 0.40             | -0.40                | -0.422                   |                          | 0.248                       | 1.96             | 0.29                 |
| nitrendipine       | 3.55             | 0.55                 | -2.906                   | 3.581                    | 0.931                       | 2.98             | 0.47                 |
| ofloxacin          | 6.62             | 0.82                 | -10.566                  | 20.673                   | 3.576                       | 3.07             | 0.49                 |
| oxcarbamazepine    | 0.40             | -0.40                | -0.846                   | 0.988                    | 0.238                       | 2.26             | 0.35                 |
| pefloxacin         | 12.43            | 1.09                 | -25.980                  | 49.720                   | 6.474                       | 2.91             | 0.46                 |
| pregabalin         | 0.14             | -0.87                | -0.291                   |                          | 0.124                       | 1.65             | 0.22                 |



|                         |       |       |         |        |        |      |      |
|-------------------------|-------|-------|---------|--------|--------|------|------|
| <b>primidone</b>        | 0.22  | -0.66 | -0.569  | 0.312  | 0.263  | 2.02 | 0.31 |
| <b>propylthiouracil</b> | 0.33  | -0.48 | -2.950  | 0.400  | 0.285  | 1.51 | 0.18 |
| <b>quinine</b>          | 2.59  | 0.41  | -14.194 | 3.699  | 0.918  | 3.06 | 0.49 |
| <b>rifampicin</b>       | 0.03  | -1.53 | -0.010  | 0.034  | 0.015  | 8.37 | 0.92 |
| <b>rimantadine</b>      | 0.16  | -0.80 | 1.222   | 0.399  | 0.048  | 1.91 | 0.28 |
| <b>timolol</b>          | 0.13  | -0.88 | -0.179  | 1.304  | 0.102  | 2.88 | 0.46 |
| <b>tinidazole</b>       | 0.12  | -0.92 | -0.118  | 0.997  | -0.413 | 2.00 | 0.30 |
| <b>tramadol</b>         | 1.08  | 0.03  | 45.221  | 5.381  | 0.464  | 3.90 | 0.59 |
| <b>trimethoprim</b>     | 0.85  | -0.07 | -0.749  | 1.943  | 1.449  | 2.63 | 0.42 |
| <b>warfarin</b>         | 13.86 | 1.14  | -29.454 | 14.001 | 4.428  | 2.76 | 0.44 |
